# Supplementary material for: A mutation in a splicing factor that causes retinitis pigmentosa has a transcriptome-wide effect on mRNA splicing
Source: PubMed Central journal article supplement (PMC4084799; doi:10.1186/1756-0500-7-401), 2014-06-27
Supplement: 1756-0500-7-401-S1.pdf [file 1756-0500-7-401-S1.pdf]

**Supplementary Information**  
**for**  
*A mutation in a splicing factor that causes retinitis pigmentosa has a transcriptome-wide effect on mRNA splicing*

Paul K. Korir, Lisa Roberts, Raj Ramesar, Cathal Seoighe

**Contents**

|          |                                                                                    |           |
|----------|------------------------------------------------------------------------------------|-----------|
| <b>1</b> | <b>Quality Assessment</b>                                                          | <b>2</b>  |
| <b>2</b> | <b>Sample Permutations</b>                                                         | <b>3</b>  |
| 2.1      | Core Probesets . . . . .                                                           | 3         |
| 2.2      | Full Probesets . . . . .                                                           | 4         |
| <b>3</b> | <b>Additional Analyses</b>                                                         | <b>5</b>  |
| 3.1      | Splice Site Scores . . . . .                                                       | 5         |
| 3.2      | Constitutive versus Alternative Splicing Analyses . . . . .                        | 5         |
| 3.3      | U12-type Introns . . . . .                                                         | 6         |
| <b>4</b> | <b>Number of Differentially Included Probesets</b>                                 | <b>7</b>  |
| 4.1      | Differential Inclusion by Probeset Class . . . . .                                 | 7         |
| 4.2      | Core Probesets . . . . .                                                           | 8         |
| 4.3      | Full Probesets . . . . .                                                           | 9         |
| 4.4      | Exonic Probesets . . . . .                                                         | 10        |
| 4.5      | Intronic Probesets . . . . .                                                       | 11        |
| 4.6      | U12-type Intronic Probesets . . . . .                                              | 12        |
| <b>5</b> | <b>Transcript Cluster Identifiers (Metaprobesets) Associated with <i>PRPF8</i></b> | <b>12</b> |
| <b>6</b> | <b>Associated Genes</b>                                                            | <b>13</b> |
| 6.1      | Higher Inclusion in Cases . . . . .                                                | 13        |
| 6.2      | Lower Inclusion in Cases . . . . .                                                 | 17        |
| <b>7</b> | <b>Associated Exons</b>                                                            | <b>19</b> |
| 7.1      | Higher Inclusion in Cases . . . . .                                                | 19        |
| 7.2      | Lower Inclusion in Cases . . . . .                                                 | 24        |

# 1 Quality Assessment

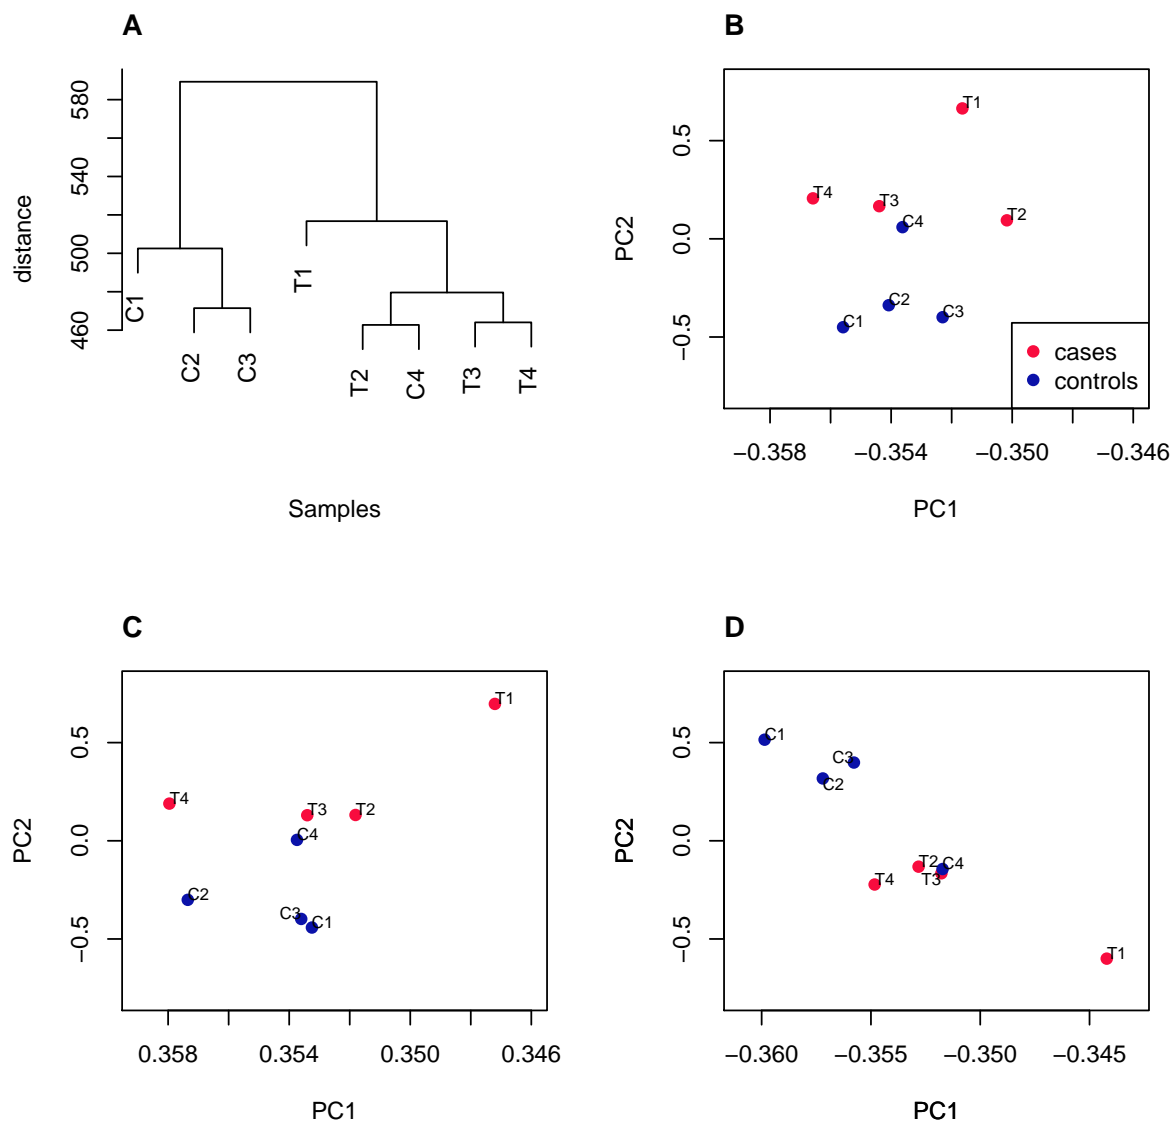

Figure S1: **Quality assessment of exon array data.** **A.** Hierarchical cluster of samples.  $T_i$  are cases,  $C_i$  are controls. **B.** Plot of first two principal components (PCs) for full probesets. **C.,D.** First two PCs for exonic and intronic probesets, respectively.

## 2 Sample Permutations

### 2.1 Core Probesets

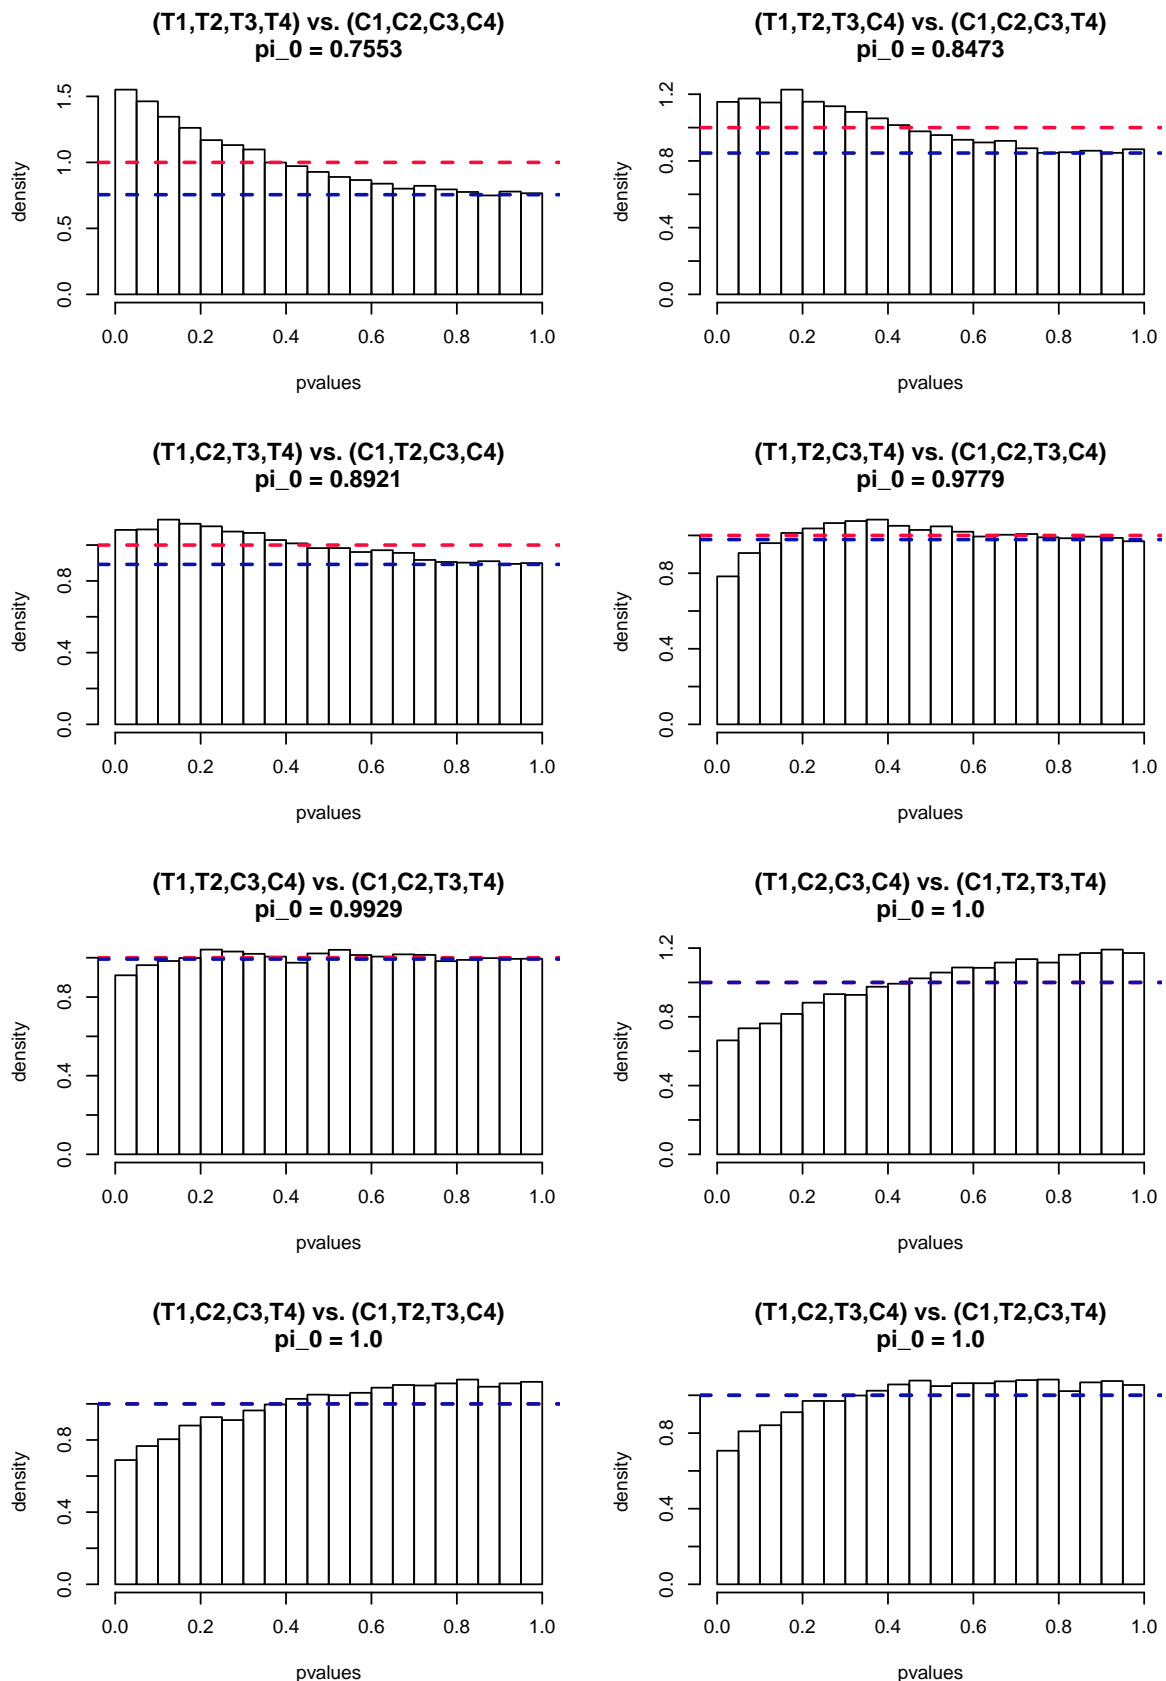

Figure S2: **Sample permutations for core probesets.** Plots representing the complete set (eight) of pairwise swaps between cases ( $T_i$ ) and controls ( $C_i$ ). Only core probesets are considered here. Plots are ordered from the top by the value of  $\pi_0$ . Dashed red line represents a uniform distribution; dashed blue lines represent the value of  $\pi_0$ .

## 2.2 Full Probesets

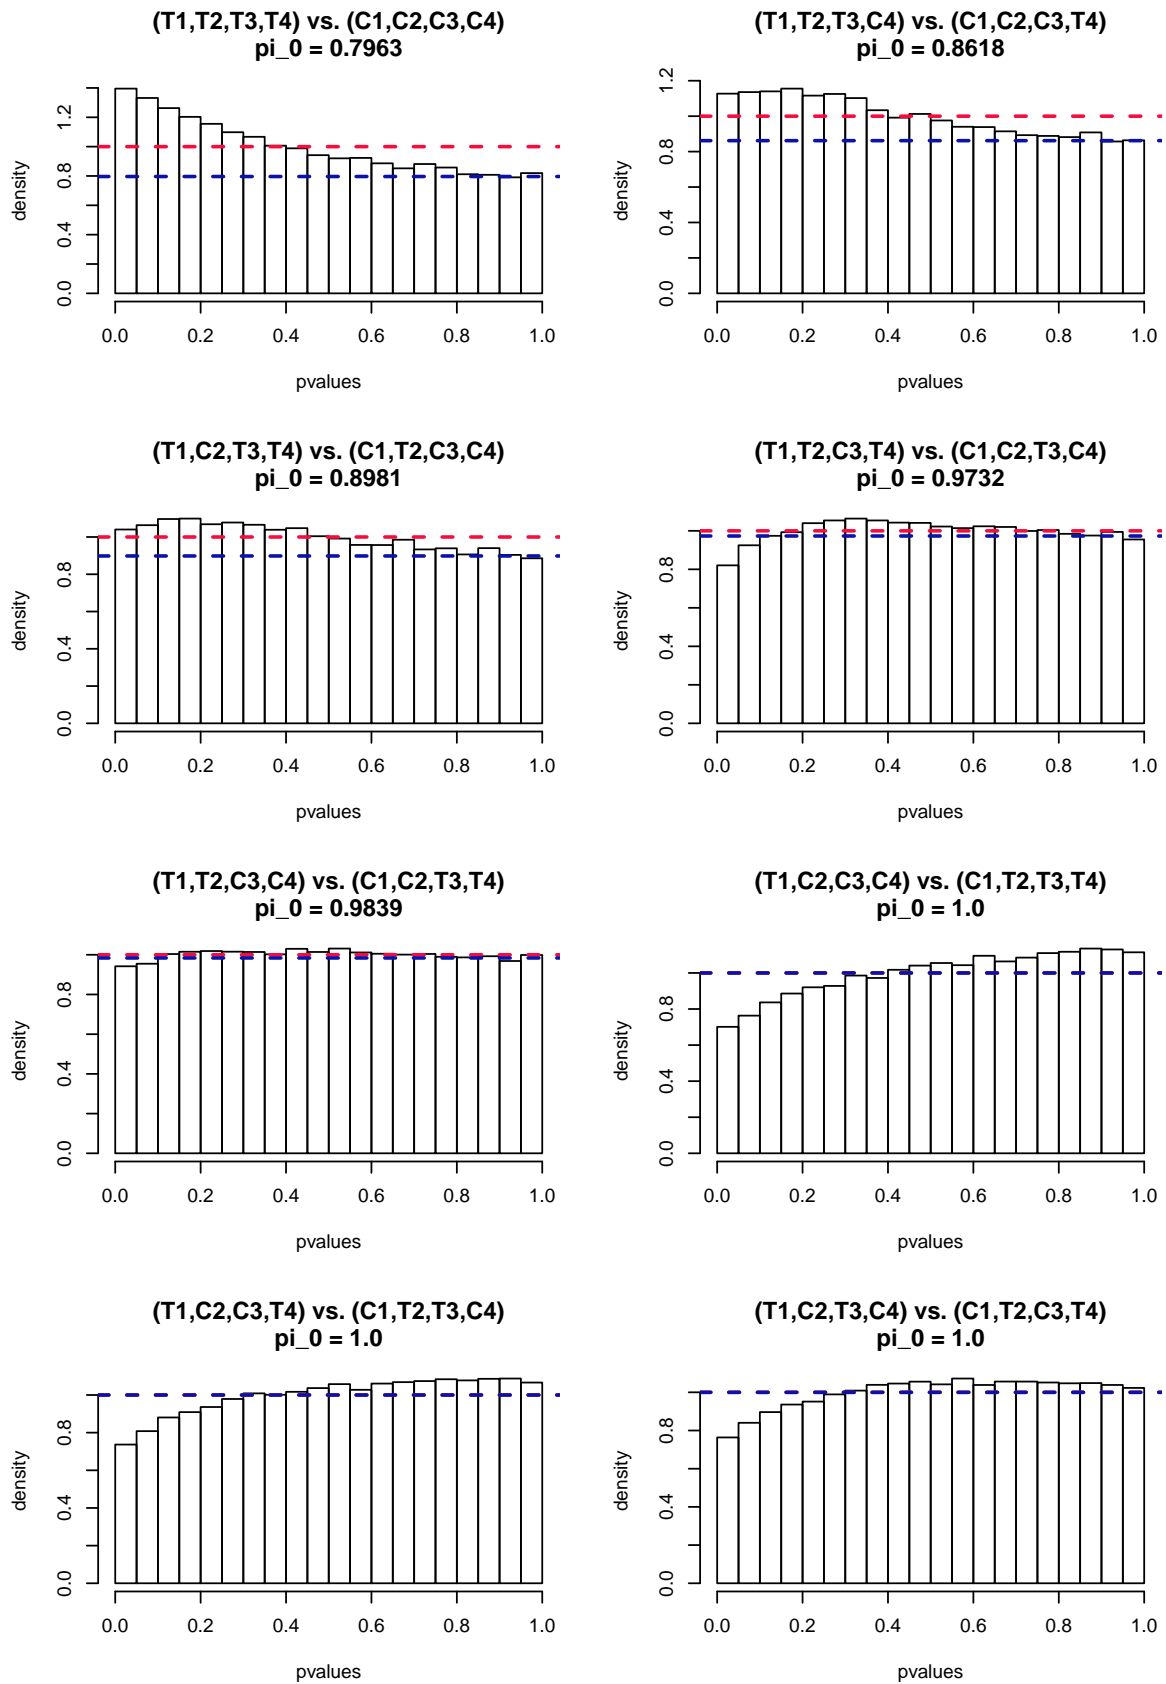

Figure S3: **Sample permutations for full probesets.** Plots representing the complete set (eight) of pairwise swaps between cases ( $T_i$ ) and controls ( $C_i$ ). Plots are ordered from the top by the value of  $\pi_0$ . Dashed red line represents a uniform distribution; dashed blue lines represent the value of  $\pi_0$ .

### 3 Additional Analyses

#### 3.1 Splice Site Scores

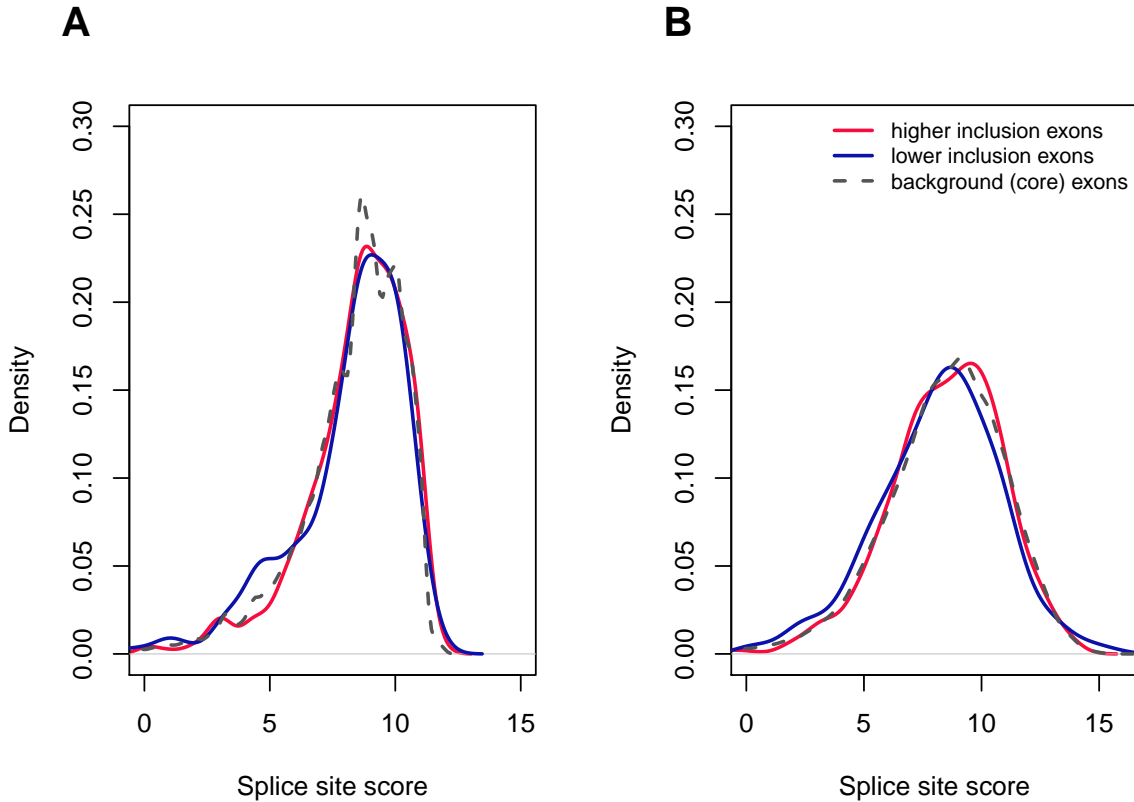

Figure S4: **Distribution of splice site scores.** Density plot of splice site scores of **A.** 5' splice sites and **B.** 3' splice sites. The dashed line indicates a similar plot for background exons (core exons).

#### 3.2 Constitutive versus Alternative Splicing Analyses

We reasoned that exons differentially included would also be enriched for alternatively spliced exons. However, we found no evidence of splicing bias for exons prone to alternative splicing. We tested this by constructing reference lists for constitutive and alternative exons in lymphoblastoid (similar to the whole blood samples we used) tissue [1] using the following procedure.

First, we aligned RNA-Seq data for 53 YRI samples to the hg19 build of the genome and isolated all junction spanning reads which numbered about 62 million reads. We then constructed a reference set of exons from the Ensembl gene model. Exons were defined at the transcript level by associating each transcript ID with the exon number (e.g. ENST\*:1 for the first exon in ENST\*). This method produced a redundant list because many exons overlap. Overlapping exons were eliminated using a randomisation procedure: from every set of exons that shared at least one terminal coordinate (start/stop) one exon was chosen at random.

For each internal exon we counted the number of reads that mapped to the upstream ( $C_1 : A$ ) and downstream ( $A : C_2$ ) junction as well as those that mapped only to flanking exons (skipping)

$(C_1 : C_2)$  [2]. We computed the percent-/proportion-spliced-in (PSI or  $\Psi$ ) using the expression

$$\Psi = \frac{\text{avg}(C_1 : A, A : C_2)}{\text{avg}(C_1 : A, A : C_2) + C_1 : C_2}.$$

An exon was considered constitutive if  $\Psi - 2 \cdot \text{SE}(\Psi) > 0.5$  and alternative if  $\Psi + 2 \cdot \text{SE}(\Psi) < 0.5$ . In this way we identified 19,685 constitutive and 3,078 alternative exons. From this list of constitutive and alternative exons we tallied those present in higher/lower inclusion in cases and compared them to similar counts in the background set of exons using Fisher's exact test. For exons included at higher levels in cases the odds ratio was 1.57 ( $p = 0.45$ ) while those included at lower levels had  $OR = 3.59$  ( $p = 0.27$ ) suggesting no splicing-specific influence.

### 3.3 U12-type Introns

We did not find any distinction in probeset intensities based on intron type. U2-type introns form the majority of introns and Fig. S6D adequately represents them. U12-type introns had a less even distribution (Supplementary Fig.S5) likely due to few probesets associated with them. No significant bias in inclusion levels was observed. We also compared U2-type and U12-type introns to each other based on their  $t$ -statistics. We found no significant difference in the  $t$ -statistics ( $p = 0.6268$ , 95% CI of difference of means:  $[-0.27, 0.17]$ ) suggesting similar distributions for both.

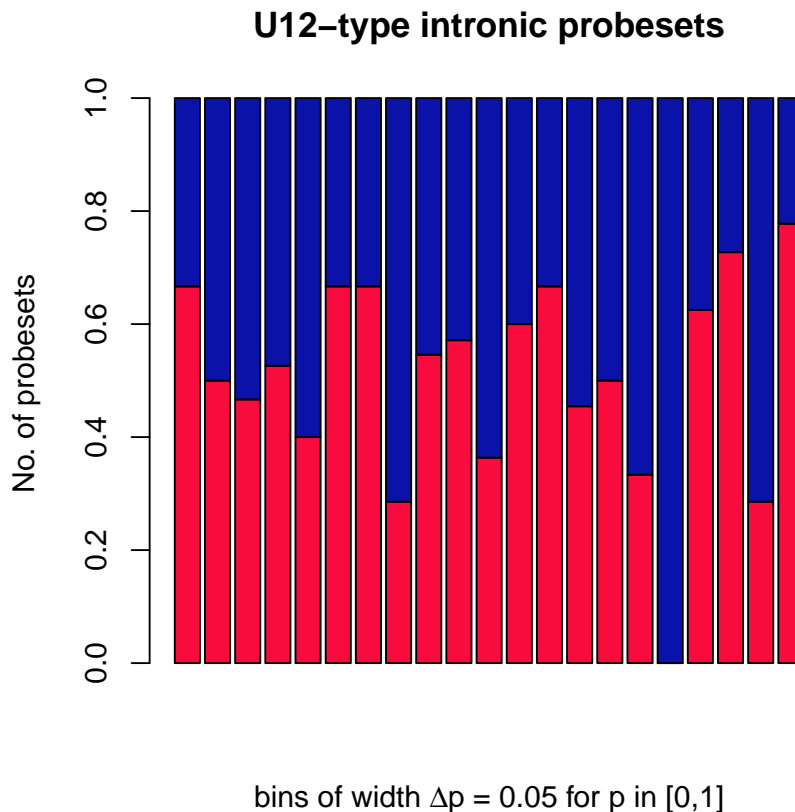

Figure S5: **Proportion of probesets indicating higher/lower inclusion in cases relative to controls for binned  $p$ -value thresholds for U12-type introns.** Each column represents all probesets (exons) for that bin. Red represent probesets included at higher levels in cases; blue are those included at lower levels in cases.

## 4 Number of Differentially Included Probesets

### 4.1 Differential Inclusion by Probeset Class

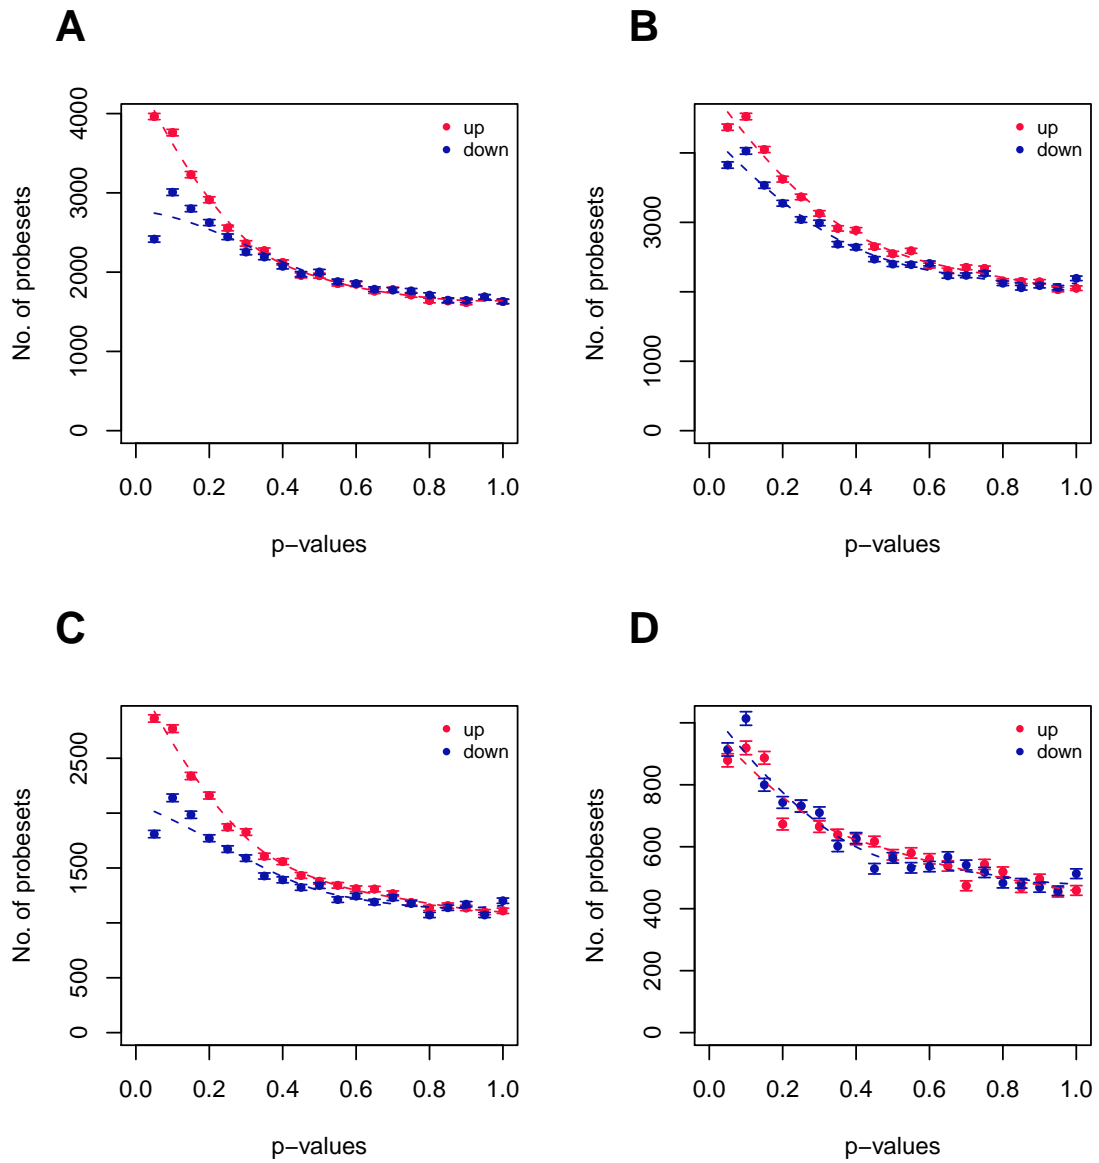

Figure S6: **Illustration of differential inclusion for different classes of probesets. A.** Core, **B.** full, **C.** exonic, and **D.** intronic probesets. Each point represents the number of probesets presenting higher ('up')/lower ('down') inclusion in cases relative to controls within  $\Delta p = 0.05$   $p$ -value bins.

## 4.2 Core Probesets

| $p$ threshold | down | up   | equal | $p$ -value             | FDR                    |
|---------------|------|------|-------|------------------------|------------------------|
| 0.01          | 473  | 1287 | 0     | $7.64 \times 10^{-87}$ | $1.61 \times 10^{-85}$ |
| 0.05          | 2417 | 3963 | 0     | $3.61 \times 10^{-84}$ | $3.79 \times 10^{-83}$ |
| 0.1           | 3008 | 3760 | 0     | $6.36 \times 10^{-20}$ | $4.45 \times 10^{-19}$ |
| 0.15          | 2801 | 3230 | 0     | $3.52 \times 10^{-8}$  | $1.85 \times 10^{-7}$  |
| 0.2           | 2625 | 2913 | 0     | $1.2 \times 10^{-4}$   | $4.8 \times 10^{-4}$   |
| 0.25          | 2446 | 2557 | 0     | 0.12                   | 0.36                   |
| 0.3           | 2253 | 2362 | 0     | 0.11                   | 0.36                   |
| 0.35          | 2190 | 2271 | 0     | 0.23                   | 0.58                   |
| 0.4           | 2073 | 2122 | 0     | 0.46                   | 0.81                   |
| 0.45          | 1975 | 1959 | 0     | 0.81                   | 0.99                   |
| 0.5           | 2003 | 1956 | 0     | 0.46                   | 0.81                   |
| 0.55          | 1881 | 1856 | 0     | 0.69                   | 0.99                   |
| 0.6           | 1857 | 1848 | 0     | 0.90                   | 0.99                   |
| 0.65          | 1784 | 1761 | 0     | 0.71                   | 0.99                   |
| 0.7           | 1774 | 1779 | 0     | 0.95                   | 0.99                   |
| 0.75          | 1764 | 1713 | 0     | 0.40                   | 0.81                   |
| 0.8           | 1710 | 1642 | 0     | 0.25                   | 0.58                   |
| 0.85          | 1646 | 1637 | 0     | 0.89                   | 0.99                   |
| 0.9           | 1643 | 1617 | 0     | 0.66                   | 0.99                   |
| 0.95          | 1688 | 1685 | 0     | 0.97                   | 0.99                   |
| 1             | 1631 | 1629 | 207   | 0.99                   | 0.99                   |

Table S1: **Number of core probesets in each bin of width  $\Delta p = 0.05$ .** Data used to produce the plots in Fig. 2 and Fig. S6.



### 4.3 Full Probesets

| $p$ threshold | down | up   | equal | $p$ -value            | FDR                    |
|---------------|------|------|-------|-----------------------|------------------------|
| 0.01          | 1147 | 1400 | 0     | $5.82 \times 10^{-7}$ | $3.054 \times 10^{-6}$ |
| 0.05          | 3825 | 4370 | 0     | $1.84 \times 10^{-9}$ | $3.86 \times 10^{-8}$  |
| 0.1           | 4028 | 4524 | 0     | $8.60 \times 10^{-8}$ | $6.02 \times 10^{-7}$  |
| 0.15          | 3534 | 4048 | 0     | $3.78 \times 10^{-9}$ | $3.40 \times 10^{-8}$  |
| 0.2           | 3275 | 3622 | 0     | $3.09 \times 10^{-5}$ | 0.00013                |
| 0.25          | 3040 | 3366 | 0     | $4.88 \times 10^{-5}$ | 0.00017                |
| 0.3           | 2991 | 3129 | 0     | 0.080                 | 0.1291                 |
| 0.35          | 2685 | 2913 | 0     | 0.0024                | 0.0063                 |
| 0.4           | 2642 | 2887 | 0     | 0.0010                | 0.0031                 |
| 0.45          | 2470 | 2650 | 0     | 0.012                 | 0.026                  |
| 0.5           | 2399 | 2548 | 0     | 0.035                 | 0.062                  |
| 0.55          | 2391 | 2590 | 0     | 0.0050                | 0.012                  |
| 0.6           | 2408 | 2378 | 0     | 0.68                  | 0.68                   |
| 0.65          | 2230 | 2306 | 0     | 0.27                  | 0.35                   |
| 0.7           | 2237 | 2352 | 0     | 0.093                 | 0.14                   |
| 0.75          | 2263 | 2337 | 0     | 0.28                  | 0.35                   |
| 0.8           | 2123 | 2155 | 0     | 0.64                  | 0.68                   |
| 0.85          | 2058 | 2150 | 0     | 0.16                  | 0.23                   |
| 0.9           | 2089 | 2143 | 0     | 0.42                  | 0.48                   |
| 0.95          | 2059 | 2032 | 0     | 0.68                  | 0.68                   |
| 1             | 2194 | 2052 | 25057 | 0.030                 | 0.058                  |

Table S2: Number of full probesets in each bin of width  $\Delta p = 0.05$

#### 4.4 Exonic Probesets

| $p$ threshold | down | up   | equal | $p$ -value             | FDR                     |
|---------------|------|------|-------|------------------------|-------------------------|
| 0.01          | 347  | 790  | 0     | $2.95 \times 10^{-40}$ | $4.59 \times 10^{-40}$  |
| 0.05          | 1809 | 2862 | 0     | $6.61 \times 10^{-54}$ | $2.059 \times 10^{-53}$ |
| 0.1           | 2139 | 2769 | 0     | $2.46 \times 10^{-19}$ | $2.55 \times 10^{-19}$  |
| 0.15          | 1985 | 2338 | 0     | $8.48 \times 10^{-8}$  | $5.29 \times 10^{-8}$   |
| 0.2           | 1771 | 2160 | 0     | $5.89 \times 10^{-10}$ | $4.59 \times 10^{-10}$  |
| 0.25          | 1672 | 1872 | 0     | 0.00083                | 0.00037                 |
| 0.3           | 1590 | 1827 | 0     | $5.37 \times 10^{-5}$  | $2.79 \times 10^{-5}$   |
| 0.35          | 1427 | 1607 | 0     | 0.0012                 | 0.00045                 |
| 0.4           | 1392 | 1558 | 0     | 0.0024                 | 0.00082                 |
| 0.45          | 1323 | 1432 | 0     | 0.040                  | 0.010                   |
| 0.5           | 1340 | 1379 | 0     | 0.47                   | 0.085                   |
| 0.55          | 1212 | 1342 | 0     | 0.011                  | 0.0033                  |
| 0.6           | 1243 | 1311 | 0     | 0.19                   | 0.038                   |
| 0.65          | 1190 | 1308 | 0     | 0.019                  | 0.0055                  |
| 0.7           | 1229 | 1266 | 0     | 0.47                   | 0.085                   |
| 0.75          | 1176 | 1186 | 0     | 0.85                   | 0.13                    |
| 0.8           | 1072 | 1136 | 0     | 0.18                   | 0.038                   |
| 0.85          | 1138 | 1157 | 0     | 0.71                   | 0.11                    |
| 0.9           | 1170 | 1136 | 0     | 0.49                   | 0.085                   |
| 0.95          | 1072 | 1098 | 0     | 0.59                   | 0.097                   |
| 1             | 1202 | 1110 | 649   | 0.058                  | 0.014                   |

Table S3: Number of exonic probesets in each bin of width  $\Delta p = 0.05$

## 4.5 Intronic Probesets

| <i>p</i> threshold | down | up  | equal | <i>p</i> -value | FDR  |
|--------------------|------|-----|-------|-----------------|------|
| 0.01               | 280  | 304 | 0     | 0.34            | 0.52 |
| 0.05               | 914  | 879 | 0     | 0.42            | 0.52 |
| 0.1                | 1014 | 919 | 0     | 0.033           | 0.17 |
| 0.15               | 800  | 887 | 0     | 0.036           | 0.17 |
| 0.2                | 743  | 673 | 0     | 0.067           | 0.24 |
| 0.25               | 731  | 732 | 0     | 1               | 0.85 |
| 0.3                | 710  | 665 | 0     | 0.24            | 0.52 |
| 0.35               | 602  | 639 | 0     | 0.31            | 0.52 |
| 0.4                | 628  | 624 | 0     | 0.93            | 0.83 |
| 0.45               | 529  | 617 | 0     | 0.010           | 0.17 |
| 0.5                | 564  | 574 | 0     | 0.79            | 0.78 |
| 0.55               | 532  | 580 | 0     | 0.16            | 0.40 |
| 0.6                | 536  | 561 | 0     | 0.47            | 0.52 |
| 0.65               | 567  | 538 | 0     | 0.40            | 0.52 |
| 0.7                | 541  | 474 | 0     | 0.038           | 0.17 |
| 0.75               | 517  | 543 | 0     | 0.44            | 0.52 |
| 0.8                | 483  | 519 | 0     | 0.27            | 0.52 |
| 0.85               | 482  | 468 | 0     | 0.67            | 0.71 |
| 0.9                | 469  | 496 | 0     | 0.40            | 0.52 |
| 0.95               | 458  | 453 | 0     | 0.89            | 0.83 |
| 1                  | 513  | 459 | 4235  | 0.089           | 0.26 |

Table S4: Number of intronic probesets in each bin of width  $\Delta p = 0.05$

## 4.6 U12-type Intronic Probesets

| $p$ threshold | down | up | equal | $p$ -value | FDR |
|---------------|------|----|-------|------------|-----|
| 0.01          | 1    | 2  | 0     | 1          | 1   |
| 0.05          | 9    | 9  | 0     | 1          | 1   |
| 0.1           | 8    | 7  | 0     | 1          | 1   |
| 0.15          | 9    | 10 | 0     | 1          | 1   |
| 0.2           | 6    | 4  | 0     | 0.75       | 1   |
| 0.25          | 3    | 6  | 0     | 0.51       | 1   |
| 0.3           | 3    | 6  | 0     | 0.51       | 1   |
| 0.35          | 10   | 4  | 0     | 0.18       | 1   |
| 0.4           | 5    | 6  | 0     | 1          | 1   |
| 0.45          | 6    | 8  | 0     | 0.79       | 1   |
| 0.5           | 7    | 4  | 0     | 0.55       | 1   |
| 0.55          | 6    | 9  | 0     | 0.61       | 1   |
| 0.6           | 3    | 6  | 0     | 0.51       | 1   |
| 0.65          | 6    | 5  | 0     | 1          | 1   |
| 0.7           | 3    | 3  | 0     | 1          | 1   |
| 0.75          | 6    | 3  | 0     | 0.51       | 1   |
| 0.8           | 5    | 0  | 0     | 0.063      | 1   |
| 0.85          | 3    | 5  | 0     | 0.73       | 1   |
| 0.9           | 3    | 8  | 0     | 0.23       | 1   |
| 0.95          | 5    | 2  | 0     | 0.45       | 1   |
| 1             | 2    | 7  | 40    | 0.18       | 1   |

Table S5: Number of U12-type intronic probesets in each bin of width  $\Delta p = 0.05$

## 5 Transcript Cluster Identifiers (Metaprobesets) Associated with *PRPF8*

*PRPF8* is located on the reverse strand of chromosome 17 between base 1553923 and 1588154 (hg19 and Ensembl v.66). The following table shows corresponding metaprobesets.

| ID      | chr   | strand | start   | end     |
|---------|-------|--------|---------|---------|
| 3705896 | chr17 | +      | 1577504 | 1577972 |
| 3705894 | chr17 | +      | 1574104 | 1574222 |
| 3705898 | chr17 | +      | 1581163 | 1581608 |
| 3740589 | chr17 | -      | 1574051 | 1574859 |
| 3740625 | chr17 | -      | 1583120 | 1583533 |
| 3740649 | chr17 | -      | 1587369 | 1587620 |

Table S6: Metaprobesets along *PRPF8*. The coordinates of transcript cluster IDs along the *PRPF8* gene.

Only 3740589 and 3740625 passed quality control filtering but were not differentially expressed between cases and controls.

## 6 Associated Genes

### 6.1 Higher Inclusion in Cases

ENSG00000000971 ENSG00000001036 ENSG00000001631 ENSG00000003147 ENSG00000003393  
ENSG00000003509 ENSG00000004660 ENSG00000004809 ENSG00000004975 ENSG00000005249  
ENSG00000005302 ENSG00000005471 ENSG00000005700 ENSG00000006432 ENSG00000006634  
ENSG00000006659 ENSG00000006831 ENSG00000007264 ENSG00000007350 ENSG00000007516  
ENSG00000007923 ENSG00000008083 ENSG00000008441 ENSG00000009307 ENSG00000009335  
ENSG00000009954 ENSG00000010404 ENSG00000010704 ENSG00000011007 ENSG00000011028  
ENSG00000011295 ENSG00000011566 ENSG00000012983 ENSG00000013306 ENSG00000013364  
ENSG00000013725 ENSG00000014138 ENSG00000014216 ENSG00000017260 ENSG00000018510  
ENSG00000023287 ENSG00000023318 ENSG00000023516 ENSG00000024048 ENSG00000028116  
ENSG00000029363 ENSG00000033122 ENSG00000034677 ENSG00000034693 ENSG00000039068  
ENSG00000040933 ENSG00000042832 ENSG00000042980 ENSG00000044115 ENSG00000047249  
ENSG00000047365 ENSG00000047410 ENSG00000047597 ENSG00000047617 ENSG00000048392  
ENSG00000048707 ENSG00000049246 ENSG00000049323 ENSG00000049541 ENSG00000049759  
ENSG00000049860 ENSG00000049883 ENSG00000052841 ENSG00000053524 ENSG00000054219  
ENSG00000054654 ENSG00000055917 ENSG00000055955 ENSG00000056586 ENSG00000058056  
ENSG00000058272 ENSG00000059378 ENSG00000059588 ENSG00000060140 ENSG00000060339  
ENSG00000061676 ENSG00000061987 ENSG00000062725 ENSG00000064042 ENSG00000064102  
ENSG00000064313 ENSG00000064393 ENSG00000064703 ENSG00000064763 ENSG00000064961  
ENSG00000065150 ENSG00000065243 ENSG00000065413 ENSG00000065485 ENSG00000065809  
ENSG00000065882 ENSG00000066855 ENSG00000066923 ENSG00000067066 ENSG00000067113  
ENSG00000067704 ENSG00000067798 ENSG00000067900 ENSG00000068878 ENSG00000068971  
ENSG00000069493 ENSG00000069696 ENSG00000069943 ENSG00000070159 ENSG00000070182  
ENSG00000070476 ENSG00000070961 ENSG00000071054 ENSG00000071537 ENSG00000072062  
ENSG00000072364 ENSG00000072415 ENSG00000072756 ENSG00000072849 ENSG00000072952  
ENSG00000073670 ENSG00000073803 ENSG00000074054 ENSG00000074276 ENSG00000074356  
ENSG00000074582 ENSG00000075275 ENSG00000075340 ENSG00000075651 ENSG00000075785  
ENSG00000075826 ENSG00000075884 ENSG00000075945 ENSG00000077097 ENSG00000077274  
ENSG00000077522 ENSG00000077713 ENSG00000077721 ENSG00000078328 ENSG00000078618  
ENSG00000078747 ENSG00000079263 ENSG00000079308 ENSG00000079805 ENSG00000079819  
ENSG00000079841 ENSG00000080298 ENSG00000080345 ENSG00000080546 ENSG00000080823  
ENSG00000081189 ENSG00000081923 ENSG00000082196 ENSG00000082258 ENSG00000082438  
ENSG00000082898 ENSG00000083093 ENSG00000083168 ENSG00000083642 ENSG00000084093  
ENSG00000084234 ENSG00000084754 ENSG00000084774 ENSG00000085491 ENSG00000085511  
ENSG00000085563 ENSG00000085719 ENSG00000085733 ENSG00000086232 ENSG00000086758  
ENSG00000086827 ENSG00000087245 ENSG00000087253 ENSG00000087274 ENSG00000087494  
ENSG00000087586 ENSG00000088205 ENSG00000088356 ENSG00000088827 ENSG00000088832  
ENSG00000088930 ENSG00000088970 ENSG00000089022 ENSG00000089048 ENSG00000089060  
ENSG00000089091 ENSG00000089094 ENSG00000089169 ENSG00000089234 ENSG00000089505  
ENSG00000089916 ENSG00000090238 ENSG00000090905 ENSG00000091039 ENSG00000091106  
ENSG00000091129 ENSG00000091157 ENSG00000091409 ENSG00000091436 ENSG00000092094  
ENSG00000092295 ENSG00000092330 ENSG00000092377 ENSG00000092758 ENSG00000092929  
ENSG00000093167 ENSG00000094880 ENSG00000095059 ENSG00000095066 ENSG00000095321  
ENSG00000096093 ENSG00000096401 ENSG00000099834 ENSG00000099910 ENSG00000099940  
ENSG00000099991 ENSG00000100077 ENSG00000100151 ENSG00000100225 ENSG00000100281  
ENSG00000100290 ENSG00000100294 ENSG00000100325 ENSG00000100330 ENSG00000100393  
ENSG00000100401 ENSG00000100416 ENSG00000100592 ENSG00000100604 ENSG00000100612  
ENSG00000100644 ENSG00000100650 ENSG00000100796 ENSG00000101017 ENSG00000101040  
ENSG00000101146 ENSG00000101294 ENSG00000101307 ENSG00000101442 ENSG00000101751

ENSG00000102043 ENSG00000102098 ENSG00000102125 ENSG00000102174 ENSG00000102189  
ENSG00000102543 ENSG00000102699 ENSG00000102753 ENSG00000102893 ENSG00000102897  
ENSG00000102900 ENSG00000103257 ENSG00000103335 ENSG00000103342 ENSG00000103365  
ENSG00000103522 ENSG00000103657 ENSG00000103876 ENSG00000103942 ENSG00000104154  
ENSG00000104321 ENSG00000104341 ENSG00000104774 ENSG00000104812 ENSG00000104957  
ENSG00000105370 ENSG00000105383 ENSG00000105393 ENSG00000105402 ENSG00000105497  
ENSG00000105609 ENSG00000105699 ENSG00000105810 ENSG00000105939 ENSG00000105963  
ENSG00000106012 ENSG00000106080 ENSG00000106327 ENSG00000106443 ENSG00000106546  
ENSG00000106605 ENSG00000106688 ENSG00000106804 ENSG00000107201 ENSG00000107242  
ENSG00000107262 ENSG00000107537 ENSG00000107581 ENSG00000107625 ENSG00000107672  
ENSG00000107758 ENSG00000107862 ENSG00000107897 ENSG00000108094 ENSG00000108100  
ENSG00000108278 ENSG00000108309 ENSG00000108344 ENSG00000108387 ENSG00000108389  
ENSG00000108576 ENSG00000108592 ENSG00000108799 ENSG00000108819 ENSG00000109458  
ENSG00000109685 ENSG00000110497 ENSG00000110628 ENSG00000110723 ENSG00000110799  
ENSG00000110911 ENSG00000111142 ENSG00000111231 ENSG00000111291 ENSG00000111371  
ENSG00000111554 ENSG00000111615 ENSG00000111644 ENSG00000111647 ENSG00000111666  
ENSG00000111696 ENSG00000111783 ENSG00000111799 ENSG00000111845 ENSG00000111886  
ENSG00000112038 ENSG00000112146 ENSG00000112186 ENSG00000112200 ENSG00000112249  
ENSG00000112294 ENSG00000112494 ENSG00000112511 ENSG00000112799 ENSG00000112893  
ENSG00000112983 ENSG00000112996 ENSG00000113108 ENSG00000113318 ENSG00000113327  
ENSG00000113369 ENSG00000113407 ENSG00000113441 ENSG00000113580 ENSG00000113595  
ENSG00000113645 ENSG00000113719 ENSG00000113946 ENSG00000113971 ENSG00000114030  
ENSG00000114098 ENSG00000114127 ENSG00000114166 ENSG00000114209 ENSG00000114248  
ENSG00000114279 ENSG00000114302 ENSG00000114439 ENSG00000114626 ENSG00000114739  
ENSG00000114757 ENSG00000114770 ENSG00000114784 ENSG00000114861 ENSG00000114867  
ENSG00000114978 ENSG00000115009 ENSG00000115053 ENSG00000115091 ENSG00000115109  
ENSG00000115267 ENSG00000115271 ENSG00000115295 ENSG00000115464 ENSG00000115947  
ENSG00000115966 ENSG00000116062 ENSG00000116117 ENSG00000116299 ENSG00000116539  
ENSG00000116580 ENSG00000116586 ENSG00000116675 ENSG00000116679 ENSG00000116748  
ENSG00000116957 ENSG00000117523 ENSG00000117614 ENSG00000117625 ENSG00000117697  
ENSG00000117713 ENSG00000118004 ENSG00000118193 ENSG00000118420 ENSG00000118473  
ENSG00000118707 ENSG00000118777 ENSG00000118873 ENSG00000118900 ENSG00000119041  
ENSG00000119121 ENSG00000119139 ENSG00000119314 ENSG00000119318 ENSG00000119383  
ENSG00000119487 ENSG00000119522 ENSG00000119685 ENSG00000119772 ENSG00000119782  
ENSG00000119820 ENSG00000119950 ENSG00000120029 ENSG00000120253 ENSG00000120693  
ENSG00000120756 ENSG00000120899 ENSG00000121486 ENSG00000121542 ENSG00000121848  
ENSG00000121892 ENSG00000121895 ENSG00000122008 ENSG00000122025 ENSG00000122068  
ENSG00000122223 ENSG00000122299 ENSG00000122484 ENSG00000122643 ENSG00000122687  
ENSG00000122756 ENSG00000122783 ENSG00000122958 ENSG00000123104 ENSG00000123200  
ENSG00000123213 ENSG00000123240 ENSG00000123496 ENSG00000123505 ENSG00000123607  
ENSG00000123609 ENSG00000123636 ENSG00000123815 ENSG00000123836 ENSG00000123892  
ENSG00000124193 ENSG00000124207 ENSG00000124214 ENSG00000124215 ENSG00000124356  
ENSG00000124571 ENSG00000124574 ENSG00000124596 ENSG00000124767 ENSG00000124782  
ENSG00000124788 ENSG00000125107 ENSG00000125257 ENSG00000125375 ENSG00000125676  
ENSG00000125695 ENSG00000125863 ENSG00000125952 ENSG00000126070 ENSG00000126091  
ENSG00000126231 ENSG00000126777 ENSG00000126870 ENSG00000127328 ENSG00000127481  
ENSG00000127507 ENSG00000127603 ENSG00000127947 ENSG00000128159 ENSG00000128309  
ENSG00000128654 ENSG00000128849 ENSG00000128881 ENSG00000128908 ENSG00000128965  
ENSG00000129003 ENSG00000129084 ENSG00000129116 ENSG00000129204 ENSG00000129351  
ENSG00000129474 ENSG00000129484 ENSG00000129518 ENSG00000129696 ENSG00000130005  
ENSG00000130227 ENSG00000130313 ENSG00000130340 ENSG00000130653 ENSG00000130720

ENSG00000130803 ENSG00000130813 ENSG00000130856 ENSG00000131016 ENSG00000131203  
ENSG00000131238 ENSG00000131373 ENSG00000131467 ENSG00000131507 ENSG00000131626  
ENSG00000131773 ENSG00000131981 ENSG00000132274 ENSG00000132424 ENSG00000132485  
ENSG00000132549 ENSG00000132823 ENSG00000132963 ENSG00000133105 ENSG00000133112  
ENSG00000133114 ENSG00000133317 ENSG00000133422 ENSG00000133640 ENSG00000133678  
ENSG00000133687 ENSG00000133740 ENSG00000133805 ENSG00000133858 ENSG00000134056  
ENSG00000134077 ENSG00000134109 ENSG00000134160 ENSG00000134201 ENSG00000134222  
ENSG00000134242 ENSG00000134265 ENSG00000134285 ENSG00000134291 ENSG00000134371  
ENSG00000134452 ENSG00000134531 ENSG00000134574 ENSG00000134759 ENSG00000134815  
ENSG00000134899 ENSG00000134910 ENSG00000134982 ENSG00000135046 ENSG00000135049  
ENSG00000135205 ENSG00000135249 ENSG00000135365 ENSG00000135407 ENSG00000135473  
ENSG00000135624 ENSG00000135720 ENSG00000135723 ENSG00000135749 ENSG00000135763  
ENSG00000135913 ENSG00000135932 ENSG00000135968 ENSG00000136040 ENSG00000136052  
ENSG00000136141 ENSG00000136152 ENSG00000136153 ENSG00000136205 ENSG00000136240  
ENSG00000136247 ENSG00000136436 ENSG00000136631 ENSG00000136689 ENSG00000136819  
ENSG00000136842 ENSG00000136861 ENSG00000136895 ENSG00000136925 ENSG00000136935  
ENSG00000137055 ENSG00000137074 ENSG00000137076 ENSG00000137259 ENSG00000137343  
ENSG00000137497 ENSG00000137601 ENSG00000137726 ENSG00000137804 ENSG00000137809  
ENSG00000137845 ENSG00000137872 ENSG00000137944 ENSG00000138002 ENSG00000138041  
ENSG00000138050 ENSG00000138061 ENSG00000138074 ENSG00000138246 ENSG00000138363  
ENSG00000138378 ENSG00000138439 ENSG00000138449 ENSG00000138640 ENSG00000138642  
ENSG00000138658 ENSG00000138685 ENSG00000138735 ENSG00000138750 ENSG00000138758  
ENSG00000138802 ENSG00000138829 ENSG00000139131 ENSG00000139178 ENSG00000139197  
ENSG00000139211 ENSG00000139370 ENSG00000139684 ENSG00000139687 ENSG00000139697  
ENSG00000139974 ENSG00000140199 ENSG00000140403 ENSG00000140455 ENSG00000140525  
ENSG00000140527 ENSG00000140961 ENSG00000141258 ENSG00000141337 ENSG00000141385  
ENSG00000141447 ENSG00000141448 ENSG00000141540 ENSG00000141627 ENSG00000141720  
ENSG00000141956 ENSG00000141968 ENSG00000142188 ENSG00000142687 ENSG00000142733  
ENSG00000142798 ENSG00000142945 ENSG00000143033 ENSG00000143297 ENSG00000143382  
ENSG00000143469 ENSG00000143514 ENSG00000143643 ENSG00000143748 ENSG00000143756  
ENSG00000143776 ENSG00000143819 ENSG00000143924 ENSG00000143970 ENSG00000144283  
ENSG00000144320 ENSG00000144426 ENSG00000144445 ENSG00000144644 ENSG00000144711  
ENSG00000144747 ENSG00000144824 ENSG00000144852 ENSG00000145194 ENSG00000145244  
ENSG00000145335 ENSG00000145348 ENSG00000145703 ENSG00000145975 ENSG00000146197  
ENSG00000146263 ENSG00000146360 ENSG00000146416 ENSG00000146833 ENSG00000147168  
ENSG00000147459 ENSG00000147548 ENSG00000148143 ENSG00000148180 ENSG00000148200  
ENSG00000148204 ENSG00000148219 ENSG00000148346 ENSG00000148356 ENSG00000148358  
ENSG00000148498 ENSG00000149269 ENSG00000149308 ENSG00000149311 ENSG00000149636  
ENSG00000149654 ENSG00000150401 ENSG00000150540 ENSG00000150760 ENSG00000150990  
ENSG00000151012 ENSG00000151240 ENSG00000151292 ENSG00000151461 ENSG00000151491  
ENSG00000151503 ENSG00000151650 ENSG00000151655 ENSG00000151690 ENSG00000151718  
ENSG00000151726 ENSG00000151779 ENSG00000151789 ENSG00000151882 ENSG00000151917  
ENSG00000151923 ENSG00000152061 ENSG00000152242 ENSG00000152270 ENSG00000152503  
ENSG00000152953 ENSG00000153113 ENSG00000153140 ENSG00000153208 ENSG00000153310  
ENSG00000153339 ENSG00000153827 ENSG00000153904 ENSG00000153922 ENSG00000154027  
ENSG00000154265 ENSG00000154380 ENSG00000154655 ENSG00000154721 ENSG00000155252  
ENSG00000155508 ENSG00000155749 ENSG00000155893 ENSG00000156052 ENSG00000156414  
ENSG00000156471 ENSG00000156502 ENSG00000156504 ENSG00000156787 ENSG00000156795  
ENSG00000157578 ENSG00000157827 ENSG00000158486 ENSG00000158859 ENSG00000159217  
ENSG00000159314 ENSG00000159322 ENSG00000159335 ENSG00000159459 ENSG00000159496  
ENSG00000159579 ENSG00000159640 ENSG00000160014 ENSG00000160111 ENSG00000160185

ENSG00000160190 ENSG00000160193 ENSG00000160218 ENSG00000160305 ENSG00000161249  
ENSG00000161547 ENSG00000162148 ENSG00000162341 ENSG00000162378 ENSG00000162434  
ENSG00000162441 ENSG00000162592 ENSG00000162599 ENSG00000162631 ENSG00000162641  
ENSG00000162869 ENSG00000163001 ENSG00000163050 ENSG00000163161 ENSG00000163207  
ENSG00000163312 ENSG00000163354 ENSG00000163359 ENSG00000163406 ENSG00000163491  
ENSG00000163516 ENSG00000163539 ENSG00000163565 ENSG00000163606 ENSG00000163629  
ENSG00000163702 ENSG00000163736 ENSG00000163755 ENSG00000163781 ENSG00000163808  
ENSG00000163814 ENSG00000163820 ENSG00000163872 ENSG00000163902 ENSG00000163938  
ENSG00000163958 ENSG00000164002 ENSG00000164010 ENSG00000164038 ENSG00000164040  
ENSG00000164068 ENSG00000164073 ENSG00000164116 ENSG00000164172 ENSG00000164188  
ENSG00000164237 ENSG00000164327 ENSG00000164414 ENSG00000164576 ENSG00000164603  
ENSG00000164733 ENSG00000165288 ENSG00000165338 ENSG00000165355 ENSG00000165434  
ENSG00000165487 ENSG00000165659 ENSG00000165724 ENSG00000165732 ENSG00000166002  
ENSG00000166046 ENSG00000166091 ENSG00000166105 ENSG00000166128 ENSG00000166140  
ENSG00000166171 ENSG00000166224 ENSG00000166233 ENSG00000166321 ENSG00000166377  
ENSG00000166401 ENSG00000166415 ENSG00000166510 ENSG00000166548 ENSG00000166575  
ENSG00000166669 ENSG00000166689 ENSG00000166783 ENSG00000166823 ENSG00000166839  
ENSG00000166889 ENSG00000166912 ENSG00000167110 ENSG00000167257 ENSG00000167325  
ENSG00000167645 ENSG00000167670 ENSG00000167705 ENSG00000167711 ENSG00000167740  
ENSG00000167768 ENSG00000167842 ENSG00000167978 ENSG00000167992 ENSG00000167994  
ENSG00000168014 ENSG00000168036 ENSG00000168172 ENSG00000168214 ENSG00000168259  
ENSG00000168280 ENSG00000168297 ENSG00000168389 ENSG00000168461 ENSG00000168477  
ENSG00000168778 ENSG00000168785 ENSG00000169379 ENSG00000169567 ENSG00000169592  
ENSG00000169679 ENSG00000169696 ENSG00000169826 ENSG00000169840 ENSG00000169902  
ENSG00000169967 ENSG00000170004 ENSG00000170017 ENSG00000170037 ENSG00000170085  
ENSG00000170185 ENSG00000170271 ENSG00000170445 ENSG00000170502 ENSG00000170525  
ENSG00000170584 ENSG00000170615 ENSG00000170633 ENSG00000171067 ENSG00000171148  
ENSG00000171435 ENSG00000171490 ENSG00000171502 ENSG00000171608 ENSG00000171634  
ENSG00000171747 ENSG00000171811 ENSG00000171824 ENSG00000171840 ENSG00000171954  
ENSG00000172006 ENSG00000172071 ENSG00000172159 ENSG00000172260 ENSG00000172780  
ENSG00000172794 ENSG00000172845 ENSG00000172878 ENSG00000172888 ENSG00000172915  
ENSG00000173258 ENSG00000173473 ENSG00000173575 ENSG00000173812 ENSG00000173826  
ENSG00000174080 ENSG00000174132 ENSG00000174227 ENSG00000174238 ENSG00000174485  
ENSG00000174738 ENSG00000174799 ENSG00000174837 ENSG00000174842 ENSG00000174943  
ENSG00000175104 ENSG00000175155 ENSG00000175198 ENSG00000175216 ENSG00000175224  
ENSG00000175294 ENSG00000175471 ENSG00000175718 ENSG00000175931 ENSG00000176208  
ENSG00000176531 ENSG00000176623 ENSG00000177058 ENSG00000177103 ENSG00000177200  
ENSG00000177324 ENSG00000177380 ENSG00000177565 ENSG00000177595 ENSG00000177640  
ENSG00000177646 ENSG00000177932 ENSG00000178035 ENSG00000178202 ENSG00000178397  
ENSG00000179152 ENSG00000179213 ENSG00000179262 ENSG00000179348 ENSG00000180264  
ENSG00000180488 ENSG00000180532 ENSG00000180628 ENSG00000180871 ENSG00000181652  
ENSG00000181786 ENSG00000181826 ENSG00000181827 ENSG00000182208 ENSG00000182512  
ENSG00000182871 ENSG00000182934 ENSG00000183023 ENSG00000183091 ENSG00000183291  
ENSG00000183486 ENSG00000183495 ENSG00000183576 ENSG00000183605 ENSG00000183690  
ENSG00000183914 ENSG00000183963 ENSG00000184014 ENSG00000184156 ENSG00000184221  
ENSG00000184634 ENSG00000184752 ENSG00000184792 ENSG00000184922 ENSG00000185046  
ENSG00000185246 ENSG00000185418 ENSG00000185480 ENSG00000185630 ENSG00000186001  
ENSG00000186073 ENSG00000186104 ENSG00000186141 ENSG00000186166 ENSG00000186409  
ENSG00000186448 ENSG00000186529 ENSG00000186648 ENSG00000186815 ENSG00000186908  
ENSG00000186919 ENSG00000187008 ENSG00000187051 ENSG00000187164 ENSG00000187244  
ENSG00000187266 ENSG00000187796 ENSG00000187823 ENSG00000187848 ENSG00000188352



ENSG00000188393 ENSG00000189060 ENSG00000189077 ENSG00000189319 ENSG00000196150  
ENSG00000196152 ENSG00000196220 ENSG00000196381 ENSG00000196569 ENSG00000196642  
ENSG00000196652 ENSG00000196712 ENSG00000196739 ENSG00000196792 ENSG00000196914  
ENSG00000196987 ENSG00000197045 ENSG00000197122 ENSG00000197142 ENSG00000197181  
ENSG00000197321 ENSG00000197363 ENSG00000197375 ENSG00000197430 ENSG00000197563  
ENSG00000197601 ENSG00000197616 ENSG00000197635 ENSG00000197701 ENSG00000197779  
ENSG00000197860 ENSG00000197863 ENSG00000197930 ENSG00000197965 ENSG00000197971  
ENSG00000198001 ENSG00000198130 ENSG00000198162 ENSG00000198231 ENSG00000198315  
ENSG00000198326 ENSG00000198431 ENSG00000198466 ENSG00000198556 ENSG00000198561  
ENSG00000198673 ENSG00000198690 ENSG00000198719 ENSG00000198740 ENSG00000198752  
ENSG00000198818 ENSG00000198835 ENSG00000198959 ENSG00000203965 ENSG00000204130  
ENSG00000204219 ENSG00000204385 ENSG00000204410 ENSG00000204472 ENSG00000204613  
ENSG00000204681 ENSG00000204815 ENSG00000204843 ENSG00000205683 ENSG00000205981  
ENSG00000206560 ENSG00000211456 ENSG00000211890 ENSG00000213022 ENSG00000213185  
ENSG00000213920 ENSG00000213983 ENSG00000214078 ENSG00000215193 ENSG00000215301  
ENSG00000215440 ENSG00000221823 ENSG00000221826 ENSG00000221829 ENSG00000221914  
ENSG00000228175 ENSG00000228340 ENSG00000230626 ENSG00000231925 ENSG00000236699  
ENSG00000239521 ENSG00000239900 ENSG00000241697 ENSG00000241852 ENSG00000241878  
ENSG00000241973 ENSG00000242950 ENSG00000243811 ENSG00000244687 ENSG00000248483  
ENSG00000249087 ENSG00000249978 ENSG00000254093 ENSG00000255883 ENSG00000256043  
ENSG00000256660 ENSG00000256771 ENSG00000257335 ENSG00000258128 ENSG00000258890

## 6.2 Lower Inclusion in Cases

ENSG00000000971 ENSG00000001036 ENSG00000003400 ENSG00000003989 ENSG00000004660  
ENSG00000005381 ENSG00000005436 ENSG00000008441 ENSG00000011600 ENSG00000013306  
ENSG00000015475 ENSG00000021762 ENSG00000023839 ENSG00000025796 ENSG00000028116  
ENSG00000028203 ENSG00000032742 ENSG00000037757 ENSG00000042832 ENSG00000046651  
ENSG00000047597 ENSG00000049192 ENSG00000049759 ENSG00000050393 ENSG00000055208  
ENSG00000056972 ENSG00000057252 ENSG00000058272 ENSG00000059769 ENSG00000059915  
ENSG00000064012 ENSG00000064102 ENSG00000064270 ENSG00000064961 ENSG00000065328  
ENSG00000065534 ENSG00000065809 ENSG00000066294 ENSG00000068784 ENSG00000068885  
ENSG00000069535 ENSG00000070182 ENSG00000070444 ENSG00000070610 ENSG00000074803  
ENSG00000075891 ENSG00000075945 ENSG00000078618 ENSG00000079308 ENSG00000080007  
ENSG00000080561 ENSG00000082458 ENSG00000083097 ENSG00000083520 ENSG00000083544  
ENSG00000084234 ENSG00000084774 ENSG00000086232 ENSG00000086506 ENSG00000086717  
ENSG00000087586 ENSG00000088726 ENSG00000089091 ENSG00000090238 ENSG00000091039  
ENSG00000091128 ENSG00000091181 ENSG00000092421 ENSG00000092758 ENSG00000093167  
ENSG00000093217 ENSG00000094914 ENSG00000095321 ENSG00000096696 ENSG00000097046  
ENSG00000100023 ENSG00000100225 ENSG00000100325 ENSG00000100441 ENSG00000100490  
ENSG00000101004 ENSG00000101134 ENSG00000101670 ENSG00000101773 ENSG00000101782  
ENSG00000102189 ENSG00000102313 ENSG00000102471 ENSG00000102755 ENSG00000103148  
ENSG00000103540 ENSG00000103723 ENSG00000104903 ENSG00000105173 ENSG00000105255  
ENSG00000105270 ENSG00000105613 ENSG00000105929 ENSG00000106771 ENSG00000106804  
ENSG00000106853 ENSG00000107338 ENSG00000107951 ENSG00000108309 ENSG00000108344  
ENSG00000108576 ENSG00000108666 ENSG00000108852 ENSG00000108861 ENSG00000109182  
ENSG00000109458 ENSG00000109625 ENSG00000109680 ENSG00000110063 ENSG00000110274  
ENSG00000110811 ENSG00000111319 ENSG00000111530 ENSG00000111581 ENSG00000111602  
ENSG00000111700 ENSG00000111846 ENSG00000111879 ENSG00000112210 ENSG00000112293  
ENSG00000112305 ENSG00000112335 ENSG00000112414 ENSG00000112494 ENSG00000112761  
ENSG00000112769 ENSG00000112983 ENSG00000113140 ENSG00000113456 ENSG00000114656

ENSG00000114956 ENSG00000115020 ENSG00000115145 ENSG00000115419 ENSG00000115425  
ENSG00000115841 ENSG00000116254 ENSG00000116285 ENSG00000116711 ENSG00000116748  
ENSG00000117115 ENSG00000117592 ENSG00000118434 ENSG00000119041 ENSG00000119283  
ENSG00000119684 ENSG00000119782 ENSG00000119919 ENSG00000119927 ENSG00000120725  
ENSG00000120727 ENSG00000120899 ENSG00000121039 ENSG00000121075 ENSG00000121101  
ENSG00000122025 ENSG00000122299 ENSG00000122591 ENSG00000122783 ENSG00000123500  
ENSG00000123572 ENSG00000124092 ENSG00000124571 ENSG00000125037 ENSG00000125207  
ENSG00000125388 ENSG00000125975 ENSG00000126777 ENSG00000127955 ENSG00000128918  
ENSG00000129003 ENSG00000129295 ENSG00000129472 ENSG00000129646 ENSG00000130158  
ENSG00000130433 ENSG00000130813 ENSG00000131023 ENSG00000131203 ENSG00000131437  
ENSG00000131626 ENSG00000132330 ENSG00000132535 ENSG00000132623 ENSG00000132780  
ENSG00000132819 ENSG00000132823 ENSG00000132854 ENSG00000133107 ENSG00000133134  
ENSG00000133678 ENSG00000133858 ENSG00000133997 ENSG00000134265 ENSG00000134321  
ENSG00000134668 ENSG00000134765 ENSG00000134853 ENSG00000135049 ENSG00000135632  
ENSG00000135862 ENSG00000135945 ENSG00000135951 ENSG00000136051 ENSG00000136819  
ENSG00000136828 ENSG00000136842 ENSG00000136929 ENSG00000137210 ENSG00000137502  
ENSG00000137804 ENSG00000137809 ENSG00000137815 ENSG00000138115 ENSG00000138119  
ENSG00000138246 ENSG00000138448 ENSG00000138641 ENSG00000138722 ENSG00000139219  
ENSG00000139220 ENSG00000139287 ENSG00000139915 ENSG00000140015 ENSG00000140403  
ENSG00000140416 ENSG00000140525 ENSG00000140795 ENSG00000140798 ENSG00000141012  
ENSG00000141447 ENSG00000141503 ENSG00000141720 ENSG00000142230 ENSG00000142973  
ENSG00000143341 ENSG00000143416 ENSG00000143420 ENSG00000143552 ENSG00000143740  
ENSG00000144063 ENSG00000144554 ENSG00000144668 ENSG00000144674 ENSG00000144749  
ENSG00000144935 ENSG00000145335 ENSG00000145703 ENSG00000145730 ENSG00000145850  
ENSG00000146463 ENSG00000146555 ENSG00000146700 ENSG00000147459 ENSG00000149091  
ENSG00000149452 ENSG00000149485 ENSG00000149577 ENSG00000150048 ENSG00000150471  
ENSG00000150667 ENSG00000151353 ENSG00000151461 ENSG00000151490 ENSG00000151491  
ENSG00000151655 ENSG00000151929 ENSG00000152061 ENSG00000152782 ENSG00000153208  
ENSG00000154114 ENSG00000154330 ENSG00000154832 ENSG00000157330 ENSG00000157827  
ENSG00000158106 ENSG00000158301 ENSG00000158481 ENSG00000158856 ENSG00000158865  
ENSG00000159023 ENSG00000159314 ENSG00000159348 ENSG00000159588 ENSG00000160199  
ENSG00000160345 ENSG00000160746 ENSG00000160808 ENSG00000161791 ENSG00000162383  
ENSG00000162706 ENSG00000162753 ENSG00000162882 ENSG00000162971 ENSG00000162999  
ENSG00000163006 ENSG00000163093 ENSG00000163141 ENSG00000163467 ENSG00000163491  
ENSG00000163751 ENSG00000163958 ENSG00000164010 ENSG00000164116 ENSG00000164168  
ENSG00000164237 ENSG00000164733 ENSG00000164794 ENSG00000165521 ENSG00000165525  
ENSG00000165682 ENSG00000165684 ENSG00000165995 ENSG00000166147 ENSG00000166200  
ENSG00000166704 ENSG00000166783 ENSG00000167671 ENSG00000167705 ENSG00000167723  
ENSG00000167741 ENSG00000167800 ENSG00000167971 ENSG00000168268 ENSG00000168439  
ENSG00000168481 ENSG00000168785 ENSG00000168904 ENSG00000169118 ENSG00000169251  
ENSG00000169418 ENSG00000170271 ENSG00000170417 ENSG00000170502 ENSG00000170899  
ENSG00000171033 ENSG00000171219 ENSG00000171243 ENSG00000171298 ENSG00000171503  
ENSG00000171723 ENSG00000172260 ENSG00000172915 ENSG00000173276 ENSG00000173530  
ENSG00000174080 ENSG00000174125 ENSG00000174672 ENSG00000175155 ENSG00000175216  
ENSG00000175600 ENSG00000175832 ENSG00000176153 ENSG00000176236 ENSG00000176406  
ENSG00000176998 ENSG00000177108 ENSG00000178026 ENSG00000178075 ENSG00000178096  
ENSG00000179262 ENSG00000179361 ENSG00000179914 ENSG00000183091 ENSG00000183160  
ENSG00000183378 ENSG00000183508 ENSG00000183605 ENSG00000183625 ENSG00000183844  
ENSG00000184083 ENSG00000184258 ENSG00000184408 ENSG00000184445 ENSG00000184752  
ENSG00000184792 ENSG00000185418 ENSG00000185532 ENSG00000185909 ENSG00000186074  
ENSG00000186417 ENSG00000186431 ENSG00000186918 ENSG00000186976 ENSG00000187391

ENSG00000187475 ENSG00000187792 ENSG00000187889 ENSG00000188419 ENSG00000188580  
 ENSG00000188869 ENSG00000189060 ENSG00000189108 ENSG00000196914 ENSG00000196975  
 ENSG00000197241 ENSG00000197275 ENSG00000197343 ENSG00000197635 ENSG00000197701  
 ENSG00000197771 ENSG00000198369 ENSG00000198561 ENSG00000198626 ENSG00000198718  
 ENSG00000198795 ENSG00000198818 ENSG00000198846 ENSG00000198873 ENSG00000203965  
 ENSG00000203995 ENSG00000204410 ENSG00000204420 ENSG00000204611 ENSG00000204655  
 ENSG00000204852 ENSG00000205744 ENSG00000206190 ENSG00000211593 ENSG00000213339  
 ENSG00000214174 ENSG00000214397 ENSG00000214655 ENSG00000214944 ENSG00000215483  
 ENSG00000221968 ENSG00000230701 ENSG00000237506 ENSG00000239282 ENSG00000243667  
 ENSG00000247626 ENSG00000250722 ENSG00000256269 ENSG00000257151 ENSG00000259753

## 7 Associated Exons

### 7.1 Higher Inclusion in Cases

The list of exons analysed represent a one-to-one mapping of probesets to exons (see *Methods*). The set of exons shown here represent a random choice of all possible exons that overlap with the exon array probeset. The number after the colon (':') represents the exon number with the transcript isoform.

ENST00000005340:4 ENST00000011700:2 ENST00000257931:20 ENST00000258243:8  
 ENST00000013125:29 ENST00000025301:2 ENST00000258526:12 ENST00000258538:9  
 ENST00000040877:23 ENST00000075503:8 ENST00000260408:5 ENST00000260508:12  
 ENST00000082259:9 ENST00000083182:7 ENST00000260818:42 ENST00000261207:17  
 ENST00000158149:10 ENST00000158771:2 ENST00000261405:39 ENST00000261483:15  
 ENST00000164133:13 ENST00000164133:5 ENST00000261483:17 ENST00000261483:19  
 ENST00000198765:9 ENST00000200135:14 ENST00000261483:4 ENST00000261517:56  
 ENST00000200135:5 ENST00000202017:4 ENST00000261530:7 ENST00000261584:10  
 ENST00000202816:5 ENST00000207549:16 ENST00000261667:10 ENST00000261681:5  
 ENST00000210060:8 ENST00000215862:19 ENST00000261755:9 ENST00000261867:6  
 ENST00000216115:4 ENST00000216492:6 ENST00000262134:5 ENST00000262262:2  
 ENST00000217800:7 ENST00000217909:4 ENST00000262352:8 ENST00000262455:2  
 ENST00000219070:4 ENST00000221973:2 ENST00000262464:61 ENST00000262539:17  
 ENST00000223642:40 ENST00000225308:3 ENST00000262738:27 ENST00000263119:31  
 ENST00000229214:5 ENST00000229729:17 ENST00000263253:20 ENST00000263354:6  
 ENST00000230568:2 ENST00000230901:15 ENST00000263441:11 ENST00000263574:5  
 ENST00000231368:11 ENST00000234420:4 ENST00000263636:10 ENST00000263754:3  
 ENST00000236959:12 ENST00000237186:4 ENST00000263802:13 ENST00000263956:16  
 ENST00000237612:5 ENST00000237612:8 ENST00000263962:3 ENST00000264167:17  
 ENST00000238831:3 ENST00000242057:7 ENST00000264331:9 ENST00000264436:15  
 ENST00000242210:4 ENST00000242351:9 ENST00000264498:2 ENST00000264646:10  
 ENST00000243346:3 ENST00000243346:7 ENST00000264705:10 ENST00000264705:24  
 ENST00000243583:13 ENST00000243662:2 ENST00000264805:19 ENST00000264825:9  
 ENST00000243903:7 ENST00000244426:9 ENST00000264827:16 ENST00000264951:4  
 ENST00000244769:6 ENST00000246314:2 ENST00000265062:5 ENST00000265081:11  
 ENST00000247400:4 ENST00000250572:6 ENST00000265382:11 ENST00000265872:16  
 ENST00000251108:3 ENST00000251900:7 ENST00000266041:8 ENST00000267163:15  
 ENST00000252603:4 ENST00000253159:23 ENST00000268130:5 ENST00000269216:5  
 ENST00000253814:5 ENST00000254442:14 ENST00000269445:4 ENST00000269703:4  
 ENST00000254821:3 ENST00000256117:6 ENST00000274327:9 ENST00000274364:12

ENST00000274938:15 ENST00000275053:19 ENST00000336735:3 ENST00000337006:8  
ENST00000276440:46 ENST00000277531:13 ENST00000337318:3 ENST00000337679:3  
ENST00000278568:10 ENST00000278612:15 ENST00000338608:6 ENST00000339497:5  
ENST00000278616:31 ENST00000280333:45 ENST00000339766:3 ENST00000340022:18  
ENST00000280612:3 ENST00000281513:18 ENST00000340989:17 ENST00000341950:2  
ENST00000281772:9 ENST00000282007:8 ENST00000342160:80 ENST00000342505:13  
ENST00000282059:3 ENST00000282096:2 ENST00000342905:6 ENST00000342981:7  
ENST00000282538:8 ENST00000283351:17 ENST00000343439:8 ENST00000344492:4  
ENST00000283351:6 ENST00000283684:15 ENST00000344754:12 ENST00000344908:3  
ENST00000284031:2 ENST00000284049:24 ENST00000345102:2 ENST00000345990:10  
ENST00000286653:25 ENST00000290341:8 ENST00000346432:5 ENST00000348141:3  
ENST00000290650:43 ENST00000291574:5 ENST00000348335:4 ENST00000348616:5  
ENST00000294309:9 ENST00000294600:5 ENST00000348925:2 ENST00000348959:9  
ENST00000296129:2 ENST00000296137:5 ENST00000349456:2 ENST00000349995:7  
ENST00000296446:4 ENST00000296658:5 ENST00000352131:9 ENST00000352171:17  
ENST00000298097:2 ENST00000298198:10 ENST00000352171:25 ENST00000353578:10  
ENST00000298585:5 ENST00000299045:9 ENST00000354185:3 ENST00000354241:3  
ENST00000299167:30 ENST00000299297:3 ENST00000354273:10 ENST00000354379:3  
ENST00000300417:15 ENST00000300650:2 ENST00000354417:3 ENST00000354558:5  
ENST00000301336:5 ENST00000301843:9 ENST00000354747:7 ENST00000354831:21  
ENST00000303372:8 ENST00000303375:20 ENST00000355221:2 ENST00000355674:5  
ENST00000303375:27 ENST00000303965:25 ENST00000355725:17 ENST00000355758:6  
ENST00000304076:8 ENST00000304457:7 ENST00000355824:4 ENST00000355867:7  
ENST00000305494:14 ENST00000306729:7 ENST00000356081:2 ENST00000356083:43  
ENST00000307602:19 ENST00000307751:4 ENST00000356248:7 ENST00000356287:36  
ENST00000308736:2 ENST00000309336:9 ENST00000356462:15 ENST00000356592:4  
ENST00000310775:15 ENST00000310775:35 ENST00000356641:26 ENST00000356644:7  
ENST00000311500:3 ENST00000312637:2 ENST00000357103:2 ENST00000357321:2  
ENST00000312655:3 ENST00000312858:6 ENST00000357349:12 ENST00000357387:19  
ENST00000313663:26 ENST00000314823:2 ENST00000357395:27 ENST00000357474:6  
ENST00000315475:4 ENST00000315596:26 ENST00000357482:6 ENST00000357563:6  
ENST00000315796:7 ENST00000316219:6 ENST00000357602:10 ENST00000357604:10  
ENST00000316856:5 ENST00000317147:7 ENST00000357637:10 ENST00000357895:20  
ENST00000317243:4 ENST00000317296:2 ENST00000358025:94 ENST00000358032:5  
ENST00000317677:5 ENST00000318522:12 ENST00000358136:3 ENST00000358499:6  
ENST00000319380:7 ENST00000319481:22 ENST00000358544:23 ENST00000358552:8  
ENST00000321169:12 ENST00000321322:4 ENST00000358582:2 ENST00000358675:2  
ENST00000321370:23 ENST00000321990:18 ENST00000358951:20 ENST00000359142:18  
ENST00000322349:19 ENST00000323441:11 ENST00000359652:14 ENST00000359684:7  
ENST00000323456:17 ENST00000324219:10 ENST00000359785:7 ENST00000360222:15  
ENST00000324696:19 ENST00000325674:20 ENST00000360385:2 ENST00000360822:17  
ENST00000325722:19 ENST00000325980:2 ENST00000361078:14 ENST00000361246:8  
ENST00000326080:6 ENST00000326080:8 ENST00000361354:18 ENST00000361477:21  
ENST00000326682:2 ENST00000327087:3 ENST00000361689:10 ENST00000361731:2  
ENST00000328118:11 ENST00000329466:13 ENST00000361937:4 ENST00000366756:3  
ENST00000330236:2 ENST00000331768:4 ENST00000366920:22 ENST00000366922:15  
ENST00000333577:2 ENST00000333807:3 ENST00000366976:4 ENST00000367079:8  
ENST00000334186:8 ENST00000334318:2 ENST00000367350:19 ENST00000367429:13  
ENST00000334420:35 ENST00000334810:19 ENST00000367435:10 ENST00000367472:10  
ENST00000334859:3 ENST00000335387:3 ENST00000367506:13 ENST00000367585:2  
ENST00000335742:17 ENST00000336332:3 ENST00000367591:9 ENST00000367996:4

ENST00000368033:5 ENST00000368132:6 ENST00000383771:11 ENST00000388768:9  
ENST00000368305:2 ENST00000368331:7 ENST00000389044:32 ENST00000389720:5  
ENST00000368346:8 ENST00000368876:8 ENST00000389721:9 ENST00000389722:16  
ENST00000368898:3 ENST00000369039:17 ENST00000391955:10 ENST00000392045:4  
ENST00000369294:3 ENST00000369556:2 ENST00000392257:4 ENST00000392257:6  
ENST00000369903:3 ENST00000369936:7 ENST00000392320:9 ENST00000392465:2  
ENST00000369983:8 ENST00000370343:12 ENST00000392529:7 ENST00000392614:5  
ENST00000370420:11 ENST00000370513:19 ENST00000392677:3 ENST00000392717:8  
ENST00000370513:3 ENST00000370631:7 ENST00000392901:10 ENST00000393308:2  
ENST00000370787:2 ENST00000370958:4 ENST00000393729:15 ENST00000394060:3  
ENST00000371184:4 ENST00000371189:5 ENST00000394063:5 ENST00000394606:2  
ENST00000371477:7 ENST00000371805:10 ENST00000394821:14 ENST00000394822:6  
ENST00000371936:3 ENST00000372258:8 ENST00000394822:9 ENST00000394886:8  
ENST00000372406:17 ENST00000372410:4 ENST00000395125:20 ENST00000395211:6  
ENST00000372447:3 ENST00000372883:33 ENST00000395308:5 ENST00000395841:2  
ENST00000372899:36 ENST00000372901:44 ENST00000395886:6 ENST00000395896:49  
ENST00000372970:4 ENST00000373017:6 ENST00000395898:10 ENST00000395911:7  
ENST00000373365:2 ENST00000373555:15 ENST00000395996:31 ENST00000396031:10  
ENST00000373558:2 ENST00000373584:3 ENST00000396234:16 ENST00000396281:19  
ENST00000373620:4 ENST00000373750:5 ENST00000396328:15 ENST00000396658:2  
ENST00000373823:21 ENST00000374152:8 ENST00000396676:7 ENST00000396706:4  
ENST00000374464:4 ENST00000374512:10 ENST00000396865:11 ENST00000397227:3  
ENST00000374695:46 ENST00000374776:8 ENST00000397311:9 ENST00000397736:6  
ENST00000374864:13 ENST00000374879:6 ENST00000397881:2 ENST00000398129:10  
ENST00000374879:9 ENST00000375165:4 ENST00000398208:3 ENST00000398341:11  
ENST00000375221:15 ENST00000375226:101 ENST00000398367:11 ENST00000398569:38  
ENST00000375247:40 ENST00000375750:4 ENST00000398569:44 ENST00000398835:5  
ENST00000375955:13 ENST00000376277:17 ENST00000399100:7 ENST00000399100:8  
ENST00000376485:2 ENST00000376704:3 ENST00000399166:8 ENST00000399799:26  
ENST00000376740:4 ENST00000376872:20 ENST00000399918:3 ENST00000400105:15  
ENST00000376887:19 ENST00000376887:20 ENST00000400334:25 ENST00000400345:18  
ENST00000377223:4 ENST00000377540:6 ENST00000400537:6 ENST00000401461:11  
ENST00000377826:9 ENST00000377974:11 ENST00000401475:11 ENST00000401979:14  
ENST00000378128:6 ENST00000378164:6 ENST00000402569:3 ENST00000402938:7  
ENST00000378601:2 ENST00000378616:2 ENST00000403733:12 ENST00000404125:23  
ENST00000378643:5 ENST00000378697:6 ENST00000404251:10 ENST00000404251:7  
ENST00000378715:7 ENST00000378722:4 ENST00000404424:2 ENST00000404816:27  
ENST00000378748:11 ENST00000379028:11 ENST00000405383:4 ENST00000405570:12  
ENST00000379120:9 ENST00000379374:8 ENST00000406875:3 ENST00000409311:6  
ENST00000379568:5 ENST00000379587:15 ENST00000409788:5 ENST00000411829:12  
ENST00000379868:5 ENST00000379939:34 ENST00000412096:5 ENST00000414226:9  
ENST00000379965:6 ENST00000380030:7 ENST00000415096:14 ENST00000415178:51  
ENST00000380033:13 ENST00000380249:14 ENST00000415402:8 ENST00000415482:3  
ENST00000380314:14 ENST00000380358:31 ENST00000415485:19 ENST00000415511:2  
ENST00000380649:4 ENST00000380671:7 ENST00000415570:7 ENST00000415740:4  
ENST00000380737:9 ENST00000380746:18 ENST00000415849:3 ENST00000415948:5  
ENST00000381007:7 ENST00000381340:21 ENST00000416445:9 ENST00000417408:8  
ENST00000381340:6 ENST00000381938:5 ENST00000417413:2 ENST00000417641:13  
ENST00000381989:17 ENST00000381992:12 ENST00000417768:6 ENST00000418019:11  
ENST00000382058:3 ENST00000382850:8 ENST00000418019:22 ENST00000418390:2  
ENST00000382891:3 ENST00000383744:4 ENST00000418472:11 ENST00000418984:15

ENST00000419091:6 ENST00000419286:2 ENST00000450617:11 ENST00000451779:5  
ENST00000419479:5 ENST00000419504:22 ENST00000452508:22 ENST00000452837:7  
ENST00000419533:13 ENST00000420083:2 ENST00000453024:13 ENST00000453621:5  
ENST00000420166:3 ENST00000420632:9 ENST00000453658:13 ENST00000453764:8  
ENST00000420886:29 ENST00000420906:9 ENST00000454158:3 ENST00000455186:6  
ENST00000421084:27 ENST00000421317:7 ENST00000455558:6 ENST00000456735:9  
ENST00000421344:8 ENST00000421660:28 ENST00000456784:3 ENST00000457138:14  
ENST00000421748:6 ENST00000421794:4 ENST00000457188:3 ENST00000457572:4  
ENST00000421865:23 ENST00000422063:6 ENST00000457679:19 ENST00000457800:10  
ENST00000422431:7 ENST00000423109:2 ENST00000457905:14 ENST00000457913:12  
ENST00000423760:10 ENST00000424123:4 ENST00000459737:4 ENST00000460073:2  
ENST00000424254:2 ENST00000424848:6 ENST00000460495:8 ENST00000460658:2  
ENST00000425217:19 ENST00000425518:16 ENST00000461319:2 ENST00000461696:2  
ENST00000426203:2 ENST00000426496:9 ENST00000461774:3 ENST00000463046:9  
ENST00000426588:10 ENST00000426639:46 ENST00000463088:5 ENST00000463496:4  
ENST00000426726:2 ENST00000426778:10 ENST00000463975:3 ENST00000464661:4  
ENST00000426855:21 ENST00000427159:8 ENST00000464941:7 ENST00000464952:2  
ENST00000427231:78 ENST00000428210:9 ENST00000465020:4 ENST00000465445:8  
ENST00000428532:12 ENST00000429687:13 ENST00000465942:5 ENST00000466192:2  
ENST00000430069:13 ENST00000430153:7 ENST00000466205:2 ENST00000466380:4  
ENST00000430906:8 ENST00000430930:25 ENST00000467023:2 ENST00000467183:14  
ENST00000430930:28 ENST00000431156:3 ENST00000467991:3 ENST00000468222:5  
ENST00000431614:11 ENST00000431932:22 ENST00000468286:4 ENST00000469075:15  
ENST00000432185:5 ENST00000432910:4 ENST00000469553:12 ENST00000470408:3  
ENST00000433067:5 ENST00000433336:7 ENST00000470599:2 ENST00000470781:10  
ENST00000433384:4 ENST00000433477:5 ENST00000470890:2 ENST00000470902:4  
ENST00000433566:10 ENST00000434243:6 ENST00000471069:4 ENST00000471302:2  
ENST00000434583:9 ENST00000434918:25 ENST00000471652:7 ENST00000471858:4  
ENST00000434949:2 ENST00000435252:2 ENST00000472232:2 ENST00000472414:5  
ENST00000435944:2 ENST00000435957:2 ENST00000472428:2 ENST00000472433:2  
ENST00000437205:2 ENST00000438053:2 ENST00000473642:2 ENST00000473691:4  
ENST00000438563:3 ENST00000439966:13 ENST00000473795:3 ENST00000474225:3  
ENST00000440591:5 ENST00000441077:2 ENST00000474314:4 ENST00000474606:5  
ENST00000441946:7 ENST00000442506:21 ENST00000474859:4 ENST00000475265:3  
ENST00000442913:7 ENST00000443236:19 ENST00000475443:2 ENST00000475560:6  
ENST00000443236:22 ENST00000443351:6 ENST00000475668:27 ENST00000475675:4  
ENST00000443617:22 ENST00000443617:62 ENST00000476978:2 ENST00000477308:3  
ENST00000443617:74 ENST00000443751:3 ENST00000478407:2 ENST00000478412:3  
ENST00000444139:4 ENST00000444181:3 ENST00000478588:4 ENST00000478777:7  
ENST00000444189:2 ENST00000444746:27 ENST00000479241:13 ENST00000479605:2  
ENST00000444746:8 ENST00000444851:3 ENST00000479877:4 ENST00000480112:24  
ENST00000444971:3 ENST00000445230:2 ENST00000480112:33 ENST00000480281:2  
ENST00000445992:3 ENST00000446066:9 ENST00000480606:2 ENST00000480606:4  
ENST00000446119:3 ENST00000446172:3 ENST00000480623:5 ENST00000480886:3  
ENST00000446394:15 ENST00000446688:7 ENST00000481266:6 ENST00000481518:6  
ENST00000446688:8 ENST00000446688:9 ENST00000481751:2 ENST00000481965:3  
ENST00000447540:24 ENST00000447611:13 ENST00000482064:3 ENST00000482456:22  
ENST00000447614:8 ENST00000448202:3 ENST00000482755:2 ENST00000482953:4  
ENST00000448504:3 ENST00000449213:3 ENST00000483398:4 ENST00000483593:5  
ENST00000449802:48 ENST00000450318:9 ENST00000483871:3 ENST00000483888:33  
ENST00000450444:7 ENST00000450465:4 ENST00000484220:2 ENST00000485566:4

ENST00000485568:6 ENST00000485572:10 ENST00000530044:2 ENST00000530704:2  
ENST00000486040:3 ENST00000486979:12 ENST00000530879:2 ENST00000531107:19  
ENST00000487128:11 ENST00000487200:7 ENST00000532259:5 ENST00000532502:2  
ENST00000487556:5 ENST00000487883:2 ENST00000532742:2 ENST00000533349:4  
ENST00000488010:5 ENST00000488149:25 ENST00000533801:14 ENST00000534548:12  
ENST00000489711:14 ENST00000489740:2 ENST00000534548:9 ENST00000534738:5  
ENST00000490210:6 ENST00000490286:17 ENST00000534881:11 ENST00000535095:9  
ENST00000490566:5 ENST00000490873:6 ENST00000535106:7 ENST00000535117:4  
ENST00000492574:7 ENST00000493041:3 ENST00000535254:13 ENST00000535346:2  
ENST00000494090:26 ENST00000495044:5 ENST00000535650:11 ENST00000536121:2  
ENST00000495360:6 ENST00000495654:3 ENST00000536256:11 ENST00000536291:4  
ENST00000495713:2 ENST00000497002:4 ENST00000536649:5 ENST00000536681:8  
ENST00000497155:6 ENST00000497286:7 ENST00000536688:10 ENST00000536701:6  
ENST00000497558:5 ENST00000497607:3 ENST00000536756:4 ENST00000536796:17  
ENST00000498012:3 ENST00000498077:19 ENST00000536845:17 ENST00000537036:8  
ENST00000498144:6 ENST00000498211:3 ENST00000537081:8 ENST00000537084:21  
ENST00000498611:22 ENST00000498699:10 ENST00000537174:11 ENST00000537599:11  
ENST00000503230:10 ENST00000503868:3 ENST00000538066:16 ENST00000538611:3  
ENST00000504202:4 ENST00000504584:2 ENST00000539368:8 ENST00000539476:8  
ENST00000504706:2 ENST00000504872:4 ENST00000539513:6 ENST00000539524:29  
ENST00000506202:15 ENST00000506733:20 ENST00000539592:11 ENST00000539625:10  
ENST00000506799:5 ENST00000506816:4 ENST00000539933:3 ENST00000540043:8  
ENST00000506828:2 ENST00000507184:28 ENST00000540216:7 ENST00000540246:3  
ENST00000508066:12 ENST00000508465:2 ENST00000540418:6 ENST00000540444:42  
ENST00000508466:10 ENST00000508895:5 ENST00000540823:7 ENST00000540905:5  
ENST00000509667:2 ENST00000509732:2 ENST00000541133:5 ENST00000541188:8  
ENST00000509768:6 ENST00000510377:6 ENST00000541296:8 ENST00000541377:29  
ENST00000510533:11 ENST00000510533:4 ENST00000541394:10 ENST00000541549:8  
ENST00000510573:13 ENST00000510985:12 ENST00000542094:5 ENST00000542289:2  
ENST00000511439:4 ENST00000511939:17 ENST00000542339:4 ENST00000542445:9  
ENST00000512575:2 ENST00000512636:8 ENST00000542526:15 ENST00000542979:6  
ENST00000513031:2 ENST00000513079:4 ENST00000543127:5 ENST00000543192:11  
ENST00000513245:4 ENST00000513695:4 ENST00000543523:16 ENST00000543645:9  
ENST00000513837:8 ENST00000514141:8 ENST00000543648:2 ENST00000543662:9  
ENST00000514154:5 ENST00000515201:6 ENST00000543949:10 ENST00000544784:7  
ENST00000517339:24 ENST00000518211:4 ENST00000544853:4 ENST00000544933:3  
ENST00000519449:4 ENST00000520113:11 ENST00000545132:6 ENST00000546208:10  
ENST00000521134:14 ENST00000521356:4 ENST00000546893:8 ENST00000547043:7  
ENST00000522052:3 ENST00000522072:9 ENST00000547101:6 ENST00000547372:15  
ENST00000522083:3 ENST00000522394:2 ENST00000547540:2 ENST00000548465:2  
ENST00000522420:13 ENST00000522874:2 ENST00000549049:5 ENST00000549379:5  
ENST00000523170:2 ENST00000523212:3 ENST00000549851:7 ENST00000549944:7  
ENST00000523582:17 ENST00000523756:15 ENST00000550672:5 ENST00000551079:2  
ENST00000524114:5 ENST00000525013:3 ENST00000551673:2 ENST00000552351:7  
ENST00000525781:7 ENST00000525964:27 ENST00000552618:13 ENST00000552641:5  
ENST00000525971:11 ENST00000526262:7 ENST00000552738:23 ENST00000552994:23  
ENST00000526995:5 ENST00000526995:6 ENST00000553217:2 ENST00000553369:5  
ENST00000527141:2 ENST00000527587:10 ENST00000553412:15 ENST00000554164:2  
ENST00000527591:9 ENST00000528744:2 ENST00000554439:2 ENST00000554465:4  
ENST00000529244:5 ENST00000529588:4 ENST00000554715:5 ENST00000554752:9  
ENST00000529744:3 ENST00000529970:20 ENST00000555223:6 ENST00000555358:13

ENST00000556626:19 ENST00000556626:5 ENST00000563264:3 ENST00000564674:6  
 ENST00000557018:4 ENST00000557332:9 ENST00000565267:11 ENST00000565435:3  
 ENST00000557381:27 ENST00000558157:14 ENST00000565488:4 ENST00000565502:3  
 ENST00000558768:20 ENST00000559236:2 ENST00000565644:3 ENST00000565728:10  
 ENST00000560792:5 ENST00000561552:4 ENST00000566389:3 ENST00000566621:3  
 ENST00000562768:4 ENST00000563197:2 ENST00000569057:4

## 7.2 Lower Inclusion in Cases

ENST0000040663:4 ENST00000199708:2 ENST00000358552:3 ENST00000358866:2  
 ENST00000218436:8 ENST00000221856:3 ENST00000359169:2 ENST00000359495:2  
 ENST00000225275:10 ENST00000225805:8 ENST00000360003:15 ENST00000360064:20  
 ENST00000226432:6 ENST00000228916:7 ENST00000360790:17 ENST00000360825:3  
 ENST00000231061:9 ENST00000237163:30 ENST00000361731:7 ENST00000361924:17  
 ENST00000237201:3 ENST00000243300:26 ENST00000366652:2 ENST00000366829:5  
 ENST00000243914:10 ENST00000246199:2 ENST00000367492:100 ENST00000367492:49  
 ENST00000251507:10 ENST00000252729:3 ENST00000367714:2 ENST00000368125:2  
 ENST00000253110:5 ENST00000255174:3 ENST00000368169:4 ENST00000368416:3  
 ENST00000256379:5 ENST00000257100:11 ENST00000368761:4 ENST00000369085:3  
 ENST00000257198:4 ENST00000257290:9 ENST00000369538:7 ENST00000370296:7  
 ENST00000258341:21 ENST00000259351:2 ENST00000370336:11 ENST00000370449:10  
 ENST00000261292:9 ENST00000261707:9 ENST00000371494:6 ENST00000371923:6  
 ENST00000261722:18 ENST00000263063:7 ENST00000372044:9 ENST00000374324:8  
 ENST00000264345:2 ENST00000264705:2 ENST00000375180:3 ENST00000375755:5  
 ENST00000264741:24 ENST00000268695:10 ENST00000377314:8 ENST00000377882:6  
 ENST00000269554:8 ENST00000270225:5 ENST00000379922:10 ENST00000380550:20  
 ENST00000271854:15 ENST00000275560:5 ENST00000380968:4 ENST00000380993:22  
 ENST00000276440:18 ENST00000281017:3 ENST00000381480:9 ENST00000381913:14  
 ENST00000281172:6 ENST00000286332:5 ENST00000382040:4 ENST00000382233:8  
 ENST00000291547:6 ENST00000292246:5 ENST00000383702:12 ENST00000383807:9  
 ENST00000293590:10 ENST00000294618:4 ENST00000388781:13 ENST00000389374:10  
 ENST00000295294:2 ENST00000295408:5 ENST00000389501:10 ENST00000389934:8  
 ENST00000296046:2 ENST00000296794:34 ENST00000390015:20 ENST00000391986:5  
 ENST00000296932:4 ENST00000297404:2 ENST00000392200:16 ENST00000393853:6  
 ENST00000298527:2 ENST00000301336:4 ENST00000394809:9 ENST00000395314:13  
 ENST00000302174:7 ENST00000306317:7 ENST00000395834:3 ENST00000395896:8  
 ENST00000306821:6 ENST00000307092:4 ENST00000396212:5 ENST00000396231:2  
 ENST00000309930:7 ENST00000310018:2 ENST00000397544:5 ENST00000397843:3  
 ENST00000312584:2 ENST00000312655:2 ENST00000397937:2 ENST00000398052:5  
 ENST00000314607:11 ENST00000322349:22 ENST00000398835:4 ENST00000399039:3  
 ENST00000322893:6 ENST00000333479:34 ENST00000404451:3 ENST00000404826:10  
 ENST00000333850:8 ENST00000335968:15 ENST00000406091:22 ENST00000406432:8  
 ENST00000335968:17 ENST00000336148:14 ENST00000406964:3 ENST00000410001:16  
 ENST00000342111:2 ENST00000342711:11 ENST00000412036:11 ENST00000412964:6  
 ENST00000343516:15 ENST00000344799:7 ENST00000414624:3 ENST00000415253:2  
 ENST00000345125:2 ENST00000348962:6 ENST00000416757:2 ENST00000417700:2  
 ENST00000349874:9 ENST00000350221:8 ENST00000418664:12 ENST00000421307:12  
 ENST00000352115:7 ENST00000352896:14 ENST00000421333:6 ENST00000422516:7  
 ENST00000354381:3 ENST00000355697:13 ENST00000423070:3 ENST00000423218:14  
 ENST00000355758:2 ENST00000356865:9 ENST00000424988:3 ENST00000426726:10  
 ENST00000357041:15 ENST00000357943:9 ENST00000427976:3 ENST00000430906:10



ENST00000431798:2 ENST00000432176:10 ENST00000518467:2 ENST00000519543:11  
 ENST00000434918:26 ENST00000435584:4 ENST00000522006:6 ENST00000522335:4  
 ENST00000435834:3 ENST00000437283:3 ENST00000522795:2 ENST00000524842:4  
 ENST00000438793:15 ENST00000439988:7 ENST00000529433:3 ENST00000531532:4  
 ENST00000440705:3 ENST00000443968:9 ENST00000532494:3 ENST00000533706:20  
 ENST00000446658:2 ENST00000446903:13 ENST00000533721:2 ENST00000535878:5  
 ENST00000447096:4 ENST00000447727:11 ENST00000536246:8 ENST00000536298:18  
 ENST00000450441:3 ENST00000452134:11 ENST00000537463:23 ENST00000537652:28  
 ENST00000452512:2 ENST00000452564:14 ENST00000538066:9 ENST00000538729:6  
 ENST00000453408:9 ENST00000454345:2 ENST00000539050:5 ENST00000539099:6  
 ENST00000454536:4 ENST00000457316:4 ENST00000539100:2 ENST00000539625:2  
 ENST00000460663:6 ENST00000461039:3 ENST00000540501:3 ENST00000542398:7  
 ENST00000463743:29 ENST00000464854:2 ENST00000542445:22 ENST00000542835:4  
 ENST00000470360:9 ENST00000470597:4 ENST00000542895:24 ENST00000544037:6  
 ENST00000480294:15 ENST00000480387:2 ENST00000544640:2 ENST00000544752:11  
 ENST00000480648:7 ENST00000483465:11 ENST00000544950:19 ENST00000545140:2  
 ENST00000483720:2 ENST00000484327:12 ENST00000546060:4 ENST00000546169:3  
 ENST00000488991:5 ENST00000489796:2 ENST00000548670:2 ENST00000550053:10  
 ENST00000490550:3 ENST00000491910:3 ENST00000550286:12 ENST00000552994:32  
 ENST00000492039:4 ENST00000492917:4 ENST00000553532:5 ENST00000554017:9  
 ENST00000493649:4 ENST00000493991:5 ENST00000554922:3 ENST00000556842:3  
 ENST00000507625:7 ENST00000510263:18 ENST00000558879:2 ENST00000559982:8  
 ENST00000512840:7 ENST00000515201:4 ENST00000561425:2 ENST00000568579:8  
 ENST00000515606:7 ENST00000518236:4

## References

- [1] Pickrell J.K., Marioni J.C., Pai A.A., Degner J.F., Engelhardt B.E., Nkadori E., Vearyeras J.B., Stephens M. and Gilad Y. and Pritchard J.K. “Understanding mechanisms underlying human gene expression variation with RNA sequencing”, *Nature* 2010, 464:7289, 768–772.
- [2] Arneet L. Saltzman, Qun Pan and Benjamin J. Blencowe “Regulation of alternative splicing by the core spliceosomal machinery”, *Genes Dev.* 2011, 25:373-384.
